# Supplementary material for: Characteristics and outcomes of patients with COVID-19 admitted to hospital and intensive care in the first phase of the pandemic in Canada: a national cohort study
Source: PubMed Central journal article supplement — CMAJ Open. 2021 Mar 8;9(1):E181–8. doi: 10.9778/cmajo.20200250 (PMC8034299; doi:10.9778/cmajo.20200250), 2021-03-08
Supplement: supp_9.1.E181_2020-0250-1-at.pdf [file supp_9.1.E181_2020-0250-1-at.pdf]

## **Appendix 1 (as supplied by the authors): List of participating SPRINT-SARI Canadian sites**

### **Academic Adult Hospitals**

Centre Hospital Universite de Montreal  
Centre Hospital Universite de Sherbrooke  
Hopital L'Enfant Jesus  
Institut Universitaire de Cardiologie et de Pneumologie de Quebec  
Kingston General Hospital  
University of Manitoba  
McGill University Health Centre  
Mount Sinai Hospital  
The Ottawa Hospital  
Royal Alexandra Hospital  
St. Michael's Hospital  
Sunnybrook Hospital  
St. Joseph's Hospital, Hamilton  
University of Alberta Hospital  
Vancouver General Hospital

### **Academic Pediatric Hospitals**

The Hospital for Sick Children  
Alberta Children's Hospital  
St. Justine Hospital  
Montreal Children's Hospital

### **Community Hospitals**

William Osler Hospital  
North York General Hospital  
Toronto East General Hospital  
Joseph Brant Hospital  
Humber River Hospital  
Victoria General Hospital  
Lions Gate Hospital  
Grand River Hospital  
Grande Prairie Hospital  
Red Deer Regional Hospital  
Sturgeon Community Hospital  
Grey Nuns Community Hospital  
Brantford General Hospital
