# Supplementary material for: Characteristics and outcomes of patients with COVID-19 admitted to hospital and intensive care in the first phase of the pandemic in Canada: a national cohort study
Source: PubMed Central journal article supplement — CMAJ Open. 2021 Mar 8;9(1):E181–8. doi: 10.9778/cmajo.20200250 (PMC8034299; doi:10.9778/cmajo.20200250), 2021-03-08
Supplement: supp_9.1.E181_2020-0250-2-at.pdf [file supp_9.1.E181_2020-0250-2-at.pdf]

## **Appendix 2 (as supplied by the authors): Supplemental figures**

### Symptoms present at admission

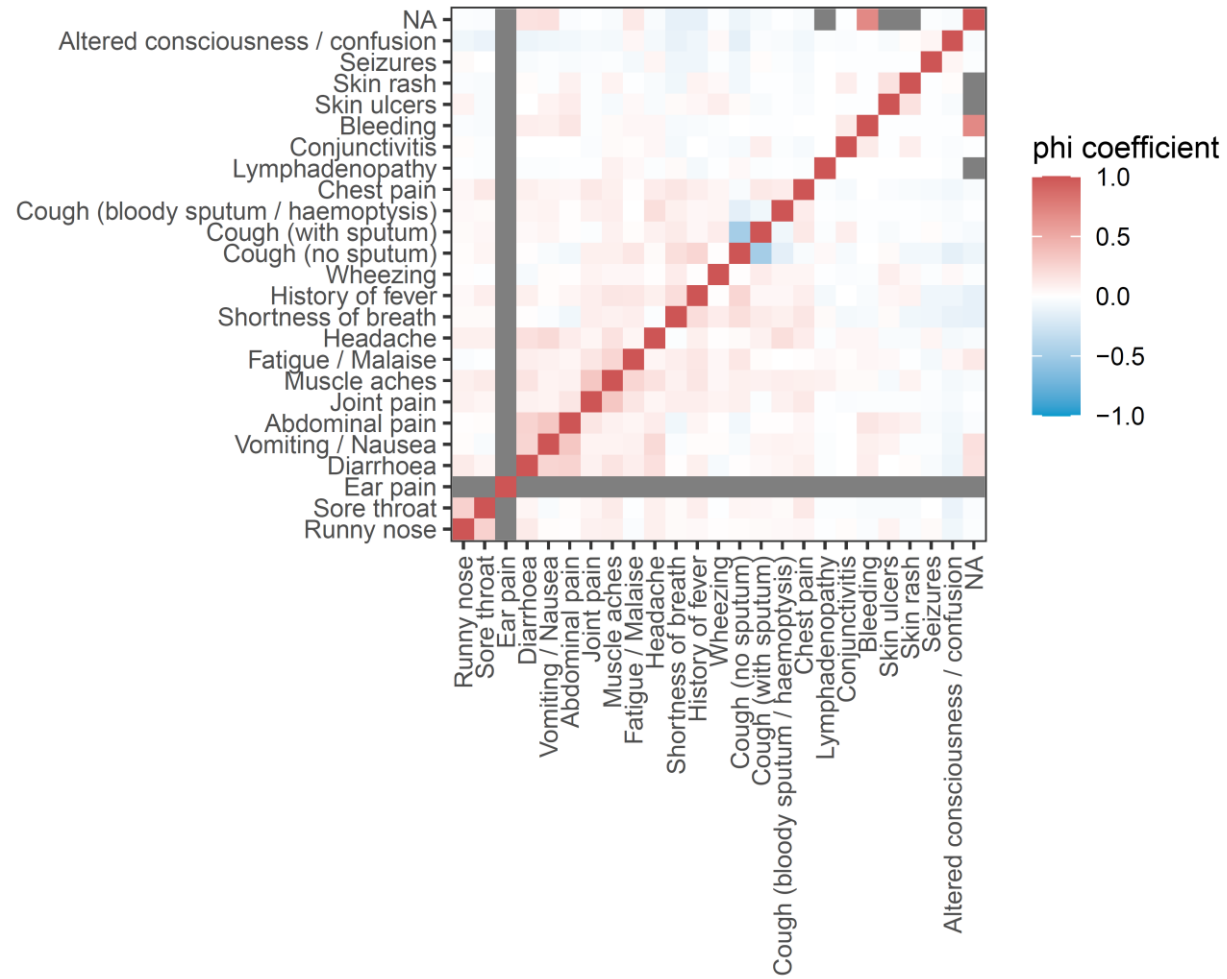

**Supplemental Figure 1:** Heatmap for correlation between symptoms

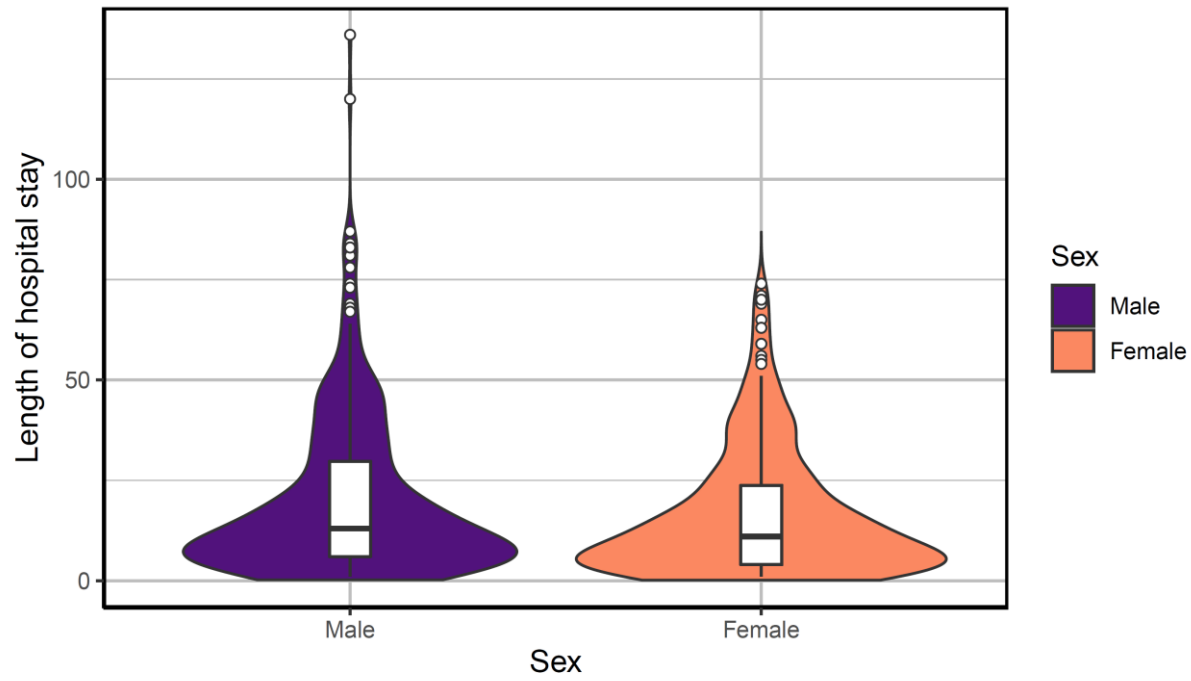

Supplemental Figure 2A

Supplemental Figure 2: Length of hospital stay (A), location (B) and age (C).

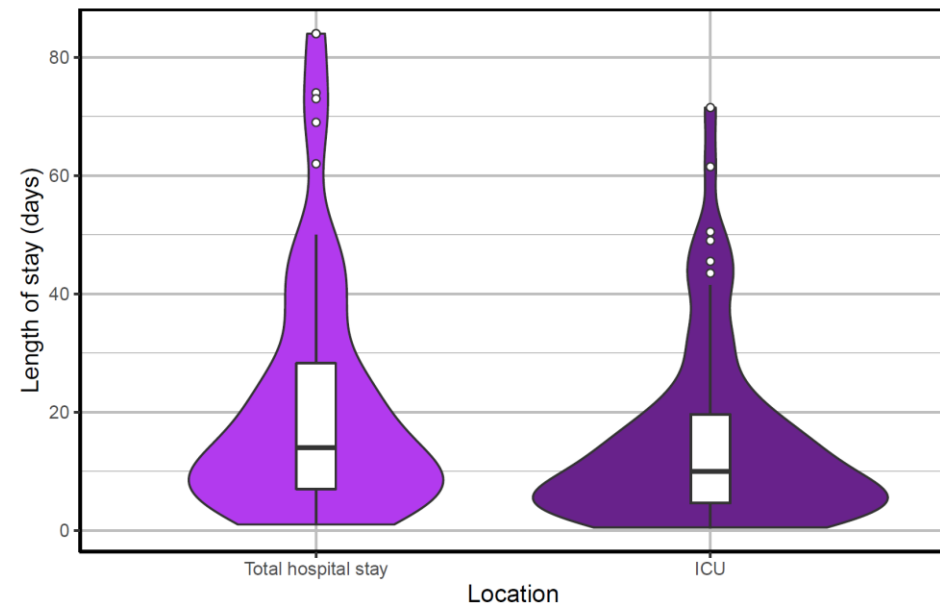

Supplemental Figure 2B

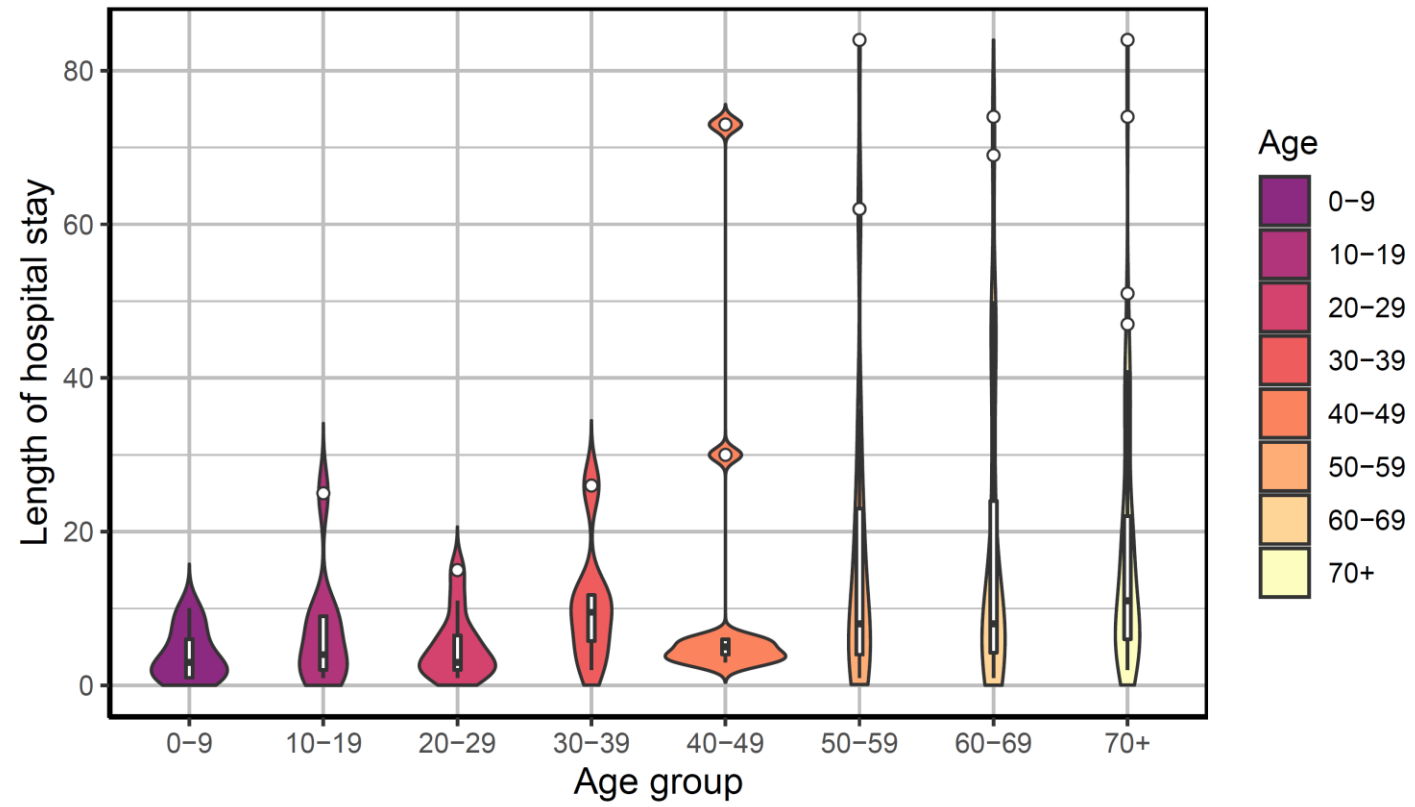

Supplemental Figure 2C

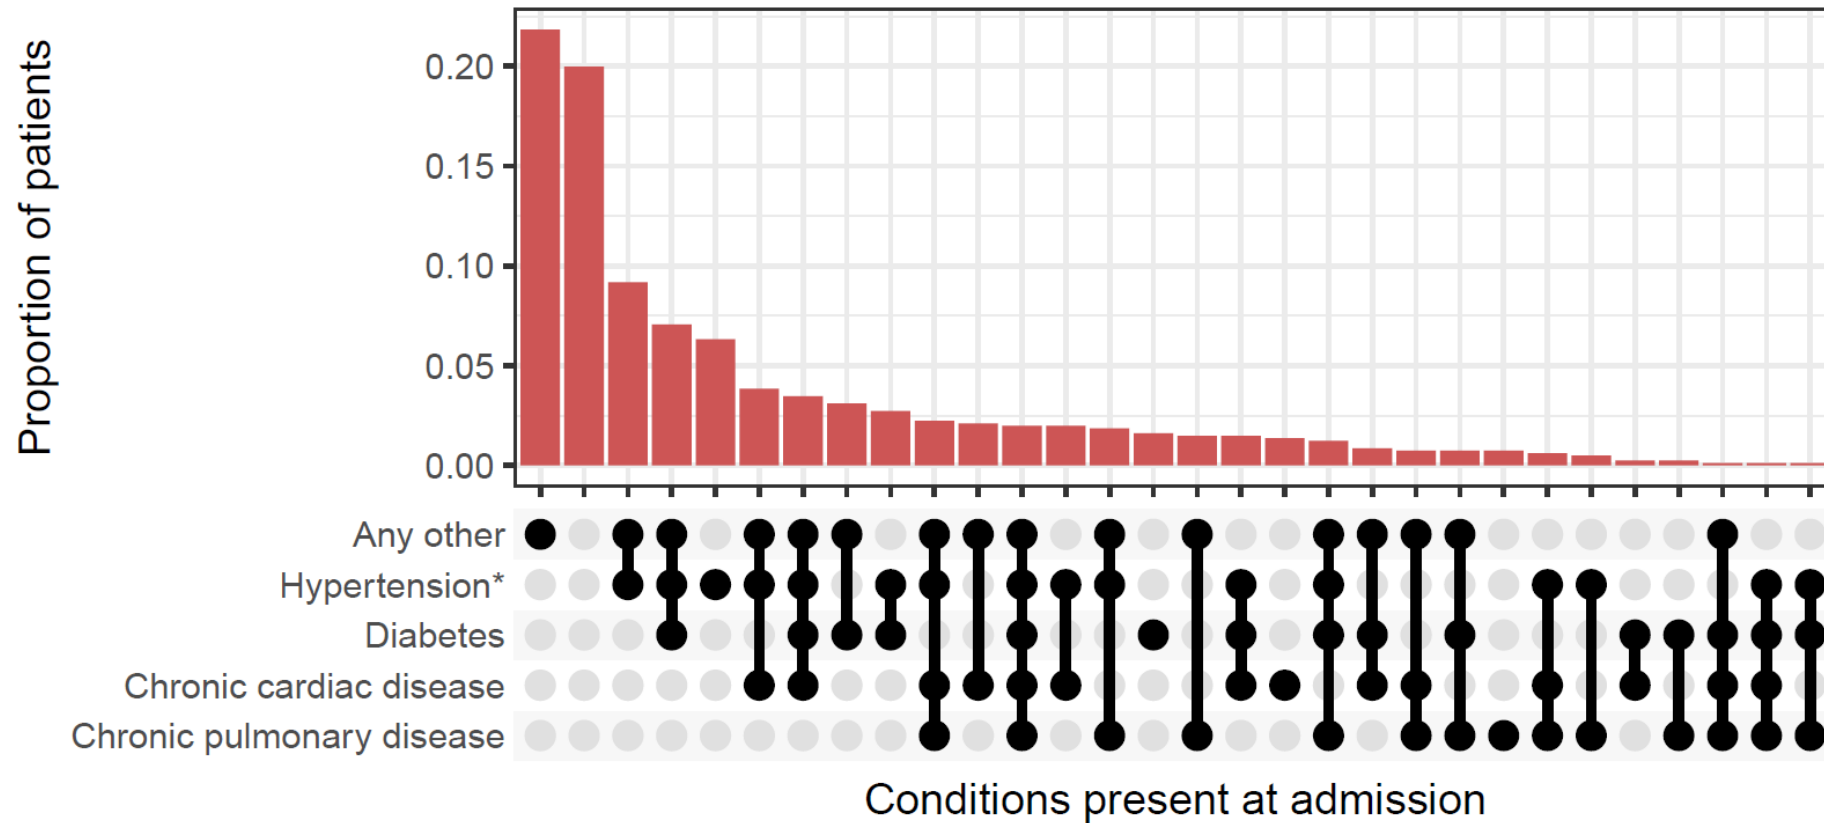

**Supplemental Figure 3:** Distribution of combinations of four most common co-morbidities; filled and empty circles below the x-axis indicate the presence or absence of each comorbidity, with other

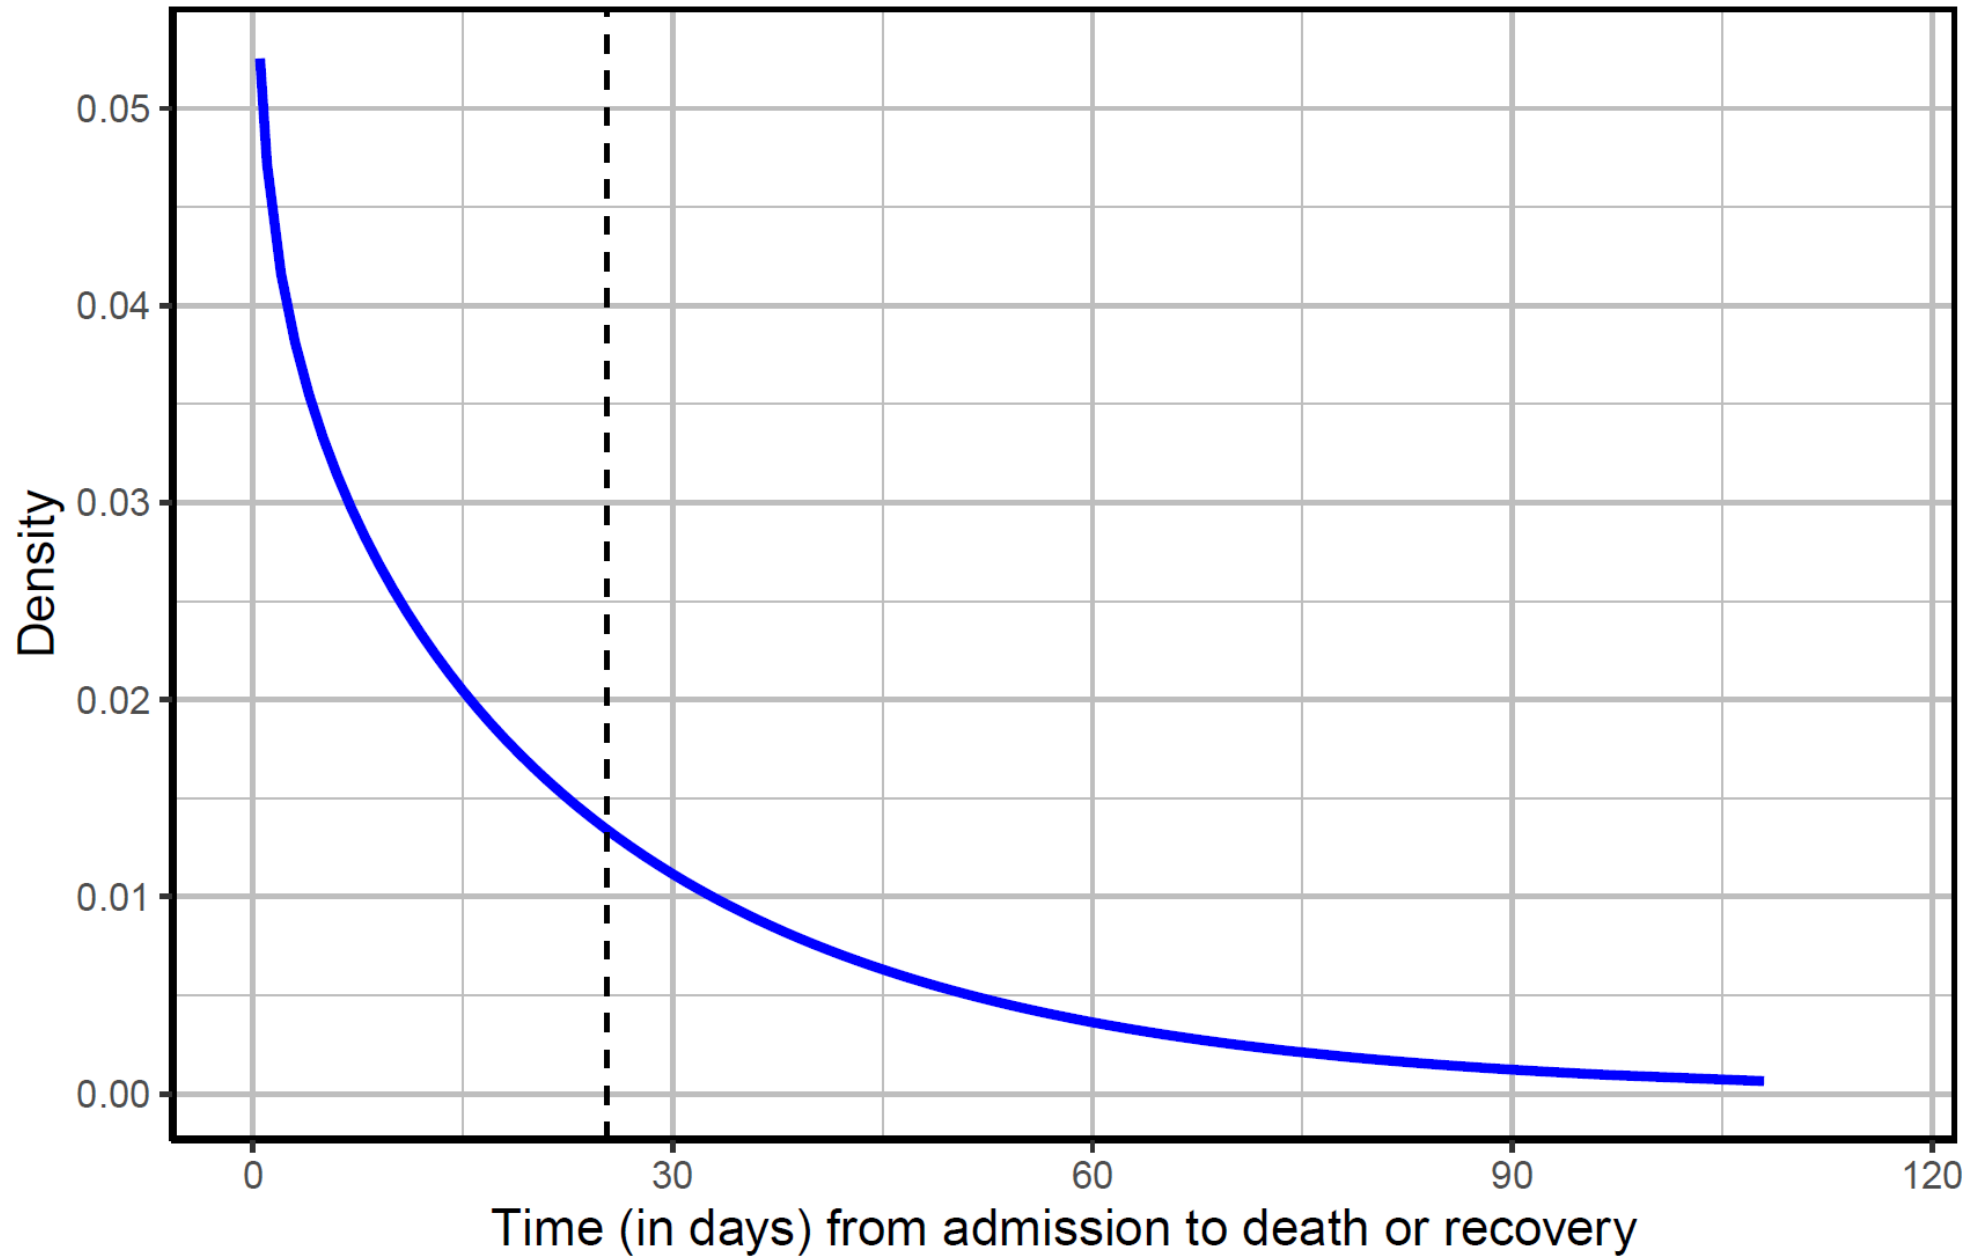

**Supplemental Figure 4:** Distribution of time from admission to outcome – either death or recovery. The blue curve is the gamma distribution fit to the data, and the black dashed line indicates the position of the expected mean. The expected mean differs from the observed mean in that it accounts for unobserved outcomes
