# Supplementary material for: Characteristics and outcomes of patients with COVID-19 admitted to hospital and intensive care in the first phase of the pandemic in Canada: a national cohort study
Source: PubMed Central journal article supplement — CMAJ Open. 2021 Mar 8;9(1):E181–8. doi: 10.9778/cmajo.20200250 (PMC8034299; doi:10.9778/cmajo.20200250), 2021-03-08
Supplement: supp_9.1.E181_2020-0250-Original-submission.pdf [file supp_9.1.E181_2020-0250-Original-submission.pdf]

1  
2  
3 **Characteristics and outcomes of hospitalized and critically ill COVID-19 patients in the first phase of**  
4 **the pandemic in Canada: A National Cohort Study**  
5

6 For the SPRINT-SARI Canada Investigators and the Canadian Critical Care Trials Group  
7

8 (submitted under a group authorship)  
9

10 Acknowledgements: This work was supported by the CIHR Coronavirus Rapid Research Funding  
11 Opportunity - OV2170359.  
12  
13

14  
15 Word Count: 1992 (excluding abstract, tables and figures)  
16  
17

18 Corresponding Author:  
19

20 Srinivas Murthy, MD CM, MHSc  
21

22 [Srinivas.murthy@cw.bc.ca](mailto:Srinivas.murthy@cw.bc.ca)  
23

24 604-875-2778  
25

26 4500 Oak Street, Vancouver, BC, V6H 3V4  
27

28 University of British Columbia  
29  
30

31 Corresponding author has no competing interests.  
32  
33

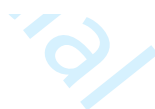

**Abstract:****Background:**

Clinical data on hospitalized patients with COVID-19 provide clinicians and public health officials with information to guide practice and policy.

**Methods:**

Through a network of hospitals, we report a national cohort study of hospitalized patients with a diagnosis of COVID-19. Descriptive analyses of characteristics, interventions, and outcomes were performed.

**Results:**

Between January and July 2020, among 811 hospitalized patients across 32 hospitals, the median age was 64 (IQR 52-75) years, 495 were male (61%), 46 (5%) were healthcare workers, 9 (1%) were pregnant, and 26 were under the age of 18 (3%) , with 9 under the age of 5 years (1%). The median time from symptom onset to hospital admission was 7 (IQR 3,10) days. The most common symptoms on admission were fever, shortness of breath, cough, and malaise. Diabetes, cardiac, kidney and respiratory disease were the most common co-morbidities. Among all patients, 328 received care in an ICU, admitted a median of 0 (IQR 0,1) days after hospital admission. Critically ill patients were treated with invasive mechanical ventilation (88%), renal replacement therapy (15%), and extra-corporeal membrane oxygenation (4%); 26% died. Among those receiving mechanical ventilation, 31% died. Age was an influential predictor of mortality (OR per additional year of life, 1.06, 95% CI 1.03-1.09).

**Interpretation:**

Patients admitted to hospital with COVID-19 commonly had fever, respiratory symptoms and comorbid conditions. Increasing age was associated with the development of critical illness and death; however, the majority of critically ill patients in Canada, including those requiring mechanical ventilation, survived and were discharged from hospital.

**Word Count: 249**

## Introduction

A chief concern over the first months of the COVID-19 pandemic has been the capacity to provide care for acutely ill patients in hospitals and intensive care units (ICUs). The variability in outcomes of patients with COVID-19 internationally has been striking, with some reports describe intensive care unit mortality in ranges between 40 and 90%;<sup>1-3</sup> and systematic reviews including 10,000 patients worldwide reveal a combined ICU mortality of 42%.<sup>4</sup> Acute care features associated with mortality include healthcare resource utilization and availability, supportive care and specific treatment strategies.<sup>5,6</sup>

Canada has had over 10,000 hospitalizations due to COVID-19 and 110,000 confirmed cases as of July 15 2020.<sup>7</sup> These hospitalizations have resulted in health system strain – particularly so in acute care and long-term care homes; however, hospitals and intensive care units have not been overwhelmed to the extent experienced in many other countries,<sup>1,8</sup> perhaps due to public health strategies that have included physical distancing and border closures, effective hospital-based infection prevention and control practices and early cessation of non-emergent care, and luck.

Documenting the numbers and characteristics of COVID-19 patients requiring hospitalization or intensive care admission across Canadian hospitals is vital to facilitate comparison to other health jurisdictions and in preparation for future pandemic waves. We aim to describe a representative population of hospitalized and critically ill patients with COVID-19 and investigate predictors of outcome using a national pre-existing registry to characterize severe acute respiratory infection.<sup>9</sup>

## Methods

### Study Design

SPRINT-SARI is a global, multi-site observational cohort of patients admitted to hospital with severe acute respiratory infection. Data has been collected in Canada and across the world since 2016, establishing research infrastructure for pandemics to rapidly produce observational data.<sup>10</sup> In January 2020, the case report form was adapted for COVID-19, and has been used, in conjunction with the International Severe Acute Respiratory Consortium (ISARIC) and the World Health Organization (WHO), around the world to describe clinical disease due to COVID-19 across populations and inform policy globally.<sup>11-13</sup> SPRINT-SARI is administered in Canada from Sunnybrook Research Institute with a global data repository coordinated by the University of Oxford, which has over 100,000 patients as of July 2020. Participating Canadian sites were recruited through the Canadian Critical Care Trials Group, and through networks of the research team, and included both pediatric and adult hospitals across the country with both academic and community hospitals. These data from Canadian hospitals are included in global datasets available [here](#).

### Participants

The study population included all patients with a confirmed diagnosis of COVID-19 who received care in an intensive care unit (ICU) in study hospitals, and up to the first 60 patients receiving care in any location of the hospital. This sampling strategy was to more comprehensively sample critically ill patients. Data were collected on admission, daily, and upon hospital discharge. Data elements were standardized with global data collection efforts with ISARIC and the WHO to optimize international comparisons. ICUs were defined as per local practice, acknowledging that the capabilities and capacities of ICUs vary across hospitals. Co-morbidities were defined by the treating clinicians as documented in

1  
2  
3 patient charts. Patients were tested for SARS-CoV-2 according to local practice and treated according to  
4 local standards of care. This study was approved by local ethics boards, generally using a waiver of  
5 consent given the need to only collect routinely available clinical data, with no need for additional study-  
6 specific diagnostic testing.  
7

### 8 Analyses

9  
10 The primary outcome measure was in-hospital mortality censored as of July 7 2020. Secondary  
11 outcomes included in-hospital mortality for patients receiving any care in an ICU and for those receiving  
12 mechanical ventilation, and duration of ICU and hospital stay. Unadjusted odds ratios for mortality with  
13 baseline demographics including age and co-morbidities were calculated by univariate analysis, with no  
14 multivariate analysis performed given the size and heterogeneity of the included dataset. Descriptive  
15 statistics included frequency analysis (percentages) for categorical variables and means (standard  
16 deviation [SD]), or medians (interquartile range [IQR]) for continuous variables depending on data  
17 distribution. Data were submitted and checked for errors by manual inspection and electronic range  
18 limits. Symptoms were examined for pairwise comparisons. Patients still alive and in-hospital at time of  
19 censoring were not included in the outcome assessments. The Kaplan-Meier method was used to depict  
20 the probability of survival over the duration of follow-up and to generate survival curves. Estimates for  
21 distribution of time-based variables were obtained through a gamma distribution fitted onto the  
22 observed data, accounting for unobserved outcomes, with estimation by a maximum likelihood  
23 procedure and confidence intervals for the means and variances obtained by bootstrap. Confidence  
24 intervals and p values reported reflect a two-tailed  $\alpha$  level of 0.05. Statistical analyses were performed  
25 in R (Vienna, Austria).<sup>14</sup> We used the STROBE statement to guide research reporting.<sup>15</sup>  
26  
27  
28  
29  
30

### 31 **Results**

32  
33 From January 24 until July 7 2020, 811 hospitalized patients across 32 hospitals (4 academic pediatric, 13  
34 community, 15 adult academic) were included in the analysis, representing approximately 8% of all  
35 hospitalized patients in Canadian (total 10,728).<sup>7</sup> Of these, 328 patients required admission to an  
36 intensive care unit, representing approximately 14% of all ICU admissions (total 2,247).<sup>7</sup>  
37

38 The median age of all patients was 64 (IQR 53-75) years, 495 were male (61%), 9 were pregnant (1.1%),  
39 46 were healthcare workers (5.7%). Twenty-six were under the age of 18 (3.2%), with 9 under the age of  
40 5 years (Table 1), with five children being admitted to ICUs in participating children's hospitals.  
41

42 Presenting symptoms are described in Figure 1, most commonly fever on admission (74%), shortness of  
43 breath (67%), cough (49%), fatigue/malaise (43%), and diarrhea (26%). Mapping symptoms into clusters  
44 (Supplemental Figure 1) revealed no clear patterns of symptoms. The median time from symptom onset  
45 to hospital admission was 7 days (IQR 3,10). Table 1 shows the most common co-morbidities, including  
46 diabetes, hypertension, cardiac, kidney and respiratory disease. Among outpatient medications, 90  
47 (11%) patients were on NSAIDs, 104 (13%) were on ACE-Inhibitors, and 122 (15%) were on angiotensin  
48 receptor blockers.  
49

50  
51 Of patients admitted to the ICU, 59% were on the first day of hospitalization and 76% of patients within  
52 the first two days of hospital admission. Supplemental Figure 5 shows the density function of time-to-  
53 outcome (death or recovery) in included patients.  
54  
55  
56  
57  
58  
59  
60

1  
2  
3 The majority of patients received antibiotics (79%) or oxygen (74%). 22% of patients received an antiviral  
4 agent, with oseltamivir, lopinavir/ritonavir, hydroxychloroquine, and ribavirin being the four most  
5 commonly used; 19% of ward patients and 32% of ICU patients received systemic corticosteroids.  
6

7  
8 As of July 7th, 166 patients had died (20%). Of the 328 patients admitted to an ICU, 86 (26%) had died,  
9 with 20 patients (2.4%) still admitted to hospital as of July 7, 2020. Seven deaths occurred in individuals  
10 less than 50, with the youngest death at age 27 (Table 3). Each additional year of age being  
11 independently associated with death on univariate analysis (OR 1.06, 95% CI 1.03-1.09). 80 hospitalized  
12 patients died without having been admitted to an ICU (48% of all deaths).  
13

14 Mortality among patients who received invasive mechanical ventilation was 31.2%, 69% among patients  
15 receiving ECMO and 46.9 % among those who received renal replacement therapy during their ICU  
16 course. Patients who died were also more likely to have comorbidities (Table 3), including hypertension  
17 (OR 2.52, 95% CI 1.7-3.78), chronic pulmonary disease (OR 3.11, 95% CI 1.93 – 4.99), chronic renal  
18 disease (OR 2.31, 95% CI 1.43-3.69), diabetes (OR 2.28, 95% CI 1.5 – 3.45), or a malignant neoplasm (OR  
19 2.31, 95% CI 1.18 – 4.42).  
20  
21

## 22 Discussion

23  
24 We report a large cohort of hospitalized Canadian patients with COVID-19, describing demographics,  
25 interventions, and clinical outcomes of patients. The most common presenting symptoms are fever and  
26 cough, and the most common co-morbidities hypertension, diabetes, and chronic kidney disease.  
27 Patients hospitalized with COVID-19 who received intensive care had a mortality of 26%; substantially  
28 lower than in many reports from other regions of the world.<sup>1,16,17</sup>  
29

30  
31 Among patients admitted to ICU, or those requiring mechanical ventilation, mortality is lower than  
32 reported in many other countries in earlier phases of the pandemic.<sup>1,4</sup> The reasons for this difference are  
33 not clear, and might reflect differing demographics across studies, the impact of limited capacity for  
34 some elements of critical care during periods of greatest COVID-19-related health system stress,  
35 differences in admission decisions or treatments, or other factors. The association of worse outcomes  
36 with older age has been previously shown; and differences in the ages of published cohorts explaining a  
37 high degree of variation in country-based case-fatality rates.<sup>18</sup> We were unable to capture the presence  
38 of do-not-resuscitate or withdrawal of life-sustaining therapy orders and patient preferences, which may  
39 differ across the lifespan, and their impact on outcomes.  
40  
41

42 The patterns of comorbid conditions described in Canada are similar to those reported globally and in a  
43 regional report from British Columbia.<sup>8, 19</sup> The proportion of patients with hypertension reflect Canada-  
44 wide population-based disease prevalence estimates (22.6%), while the proportion of patients with  
45 diabetes are higher than population-level prevalence (7%), not adjusted for age.<sup>20,21</sup> This could reflect  
46 specific associations of co-morbidities with COVID-19, be due to the purposeful oversampling of critically  
47 ill patients in this cohort, or, reflect other cohort specific features or sample size.  
48  
49

50 Fewer than 7% of patients presented without fever, shortness of breath, or fatigue or cough, similar to  
51 other cohorts.<sup>17</sup> Standard screening practices focused on respiratory symptoms in hospitals in Canada  
52 are likely to remain relevant.  
53

54 There were few children or pregnant women in this cohort. The small numbers of children are in  
55 keeping with findings elsewhere, where severe pediatric disease is relatively rare. Given the small  
56  
57

1  
2  
3 numbers of both children and pregnant women, we cannot make strong inferences about typical clinical  
4 characteristics or outcomes in these populations.<sup>19</sup> Large-scale international collaboration is required  
5 for a better understanding of the health effects on these groups.  
6

7 There has been uncertainty around optimal methods of oxygenation and ventilation support for critically  
8 ill patients with COVID-19, including the timing of intubation and mechanical ventilation, and the  
9 potential risk to health care workers in using non-invasive ventilation and high flow nasal oxygen,  
10 stemming from concern of aerosolization and nosocomial amplification of SARS-CoV-2,<sup>22</sup> which likely has  
11 influenced their infrequent use in this cohort. We have not examined the association of specific  
12 medication or ventilation treatments with clinical outcomes due to the inability to adequately adjust for  
13 confounding, immortal time, and treatment indication bias in observational studies such as this one.  
14  
15

16 The limitations of this study include the scope and granularity of data collected. Meant to be rapidly  
17 deployed, scalable, and operational at sites with varying research infrastructure, we have collected a  
18 minimal clinical dataset across Canadian hospitals. This has allowed the program to continue without  
19 pre-pandemic funding, minimizing the data collection burden at individual sites. We have not reported  
20 laboratory data in this report due to a large degree of missingness in the collected data, limiting analysis.  
21 There will be some uncertainty on long-term outcomes, better characterized through population-level  
22 studies as a number of patients have not had their final outcome declared or may have died after  
23 discharge to a long-term care facility. Symptom characterization was dependent on patient report or  
24 clinician charting – for example, the low rate of anosmia is likely in keeping with its lack of recognition  
25 early in the pandemic or in patients who were too sick to report it. More in-depth characterization of  
26 disease, and of specific sub-groups of patients, will subsequently be possible. The lack of pre-pandemic  
27 capacity for this work underscores the need for a national clinical characterization data infrastructure  
28 for hospitalized patients, that is rapidly accessible for Canadian clinicians, researchers, public health  
29 officials and policymakers to inform understanding of the baseline characteristics, risk factors for  
30 outcomes, hospital utilization, and benchmarking disease severity over waves of outbreaks and across  
31 different care systems.  
32  
33  
34  
35

36 In conclusion, we report clinical characteristics and outcomes of 811 hospitalized patients during the  
37 first wave of the COVID-19 pandemic in Canada. This data is crucial to maintain and expand during  
38 future pandemic waves to understand the impact of COVID-19 on our hospitals, to identify areas for  
39 improvements in clinical management, and to allow for ongoing international and temporal  
40 comparisons of outcomes for patients with COVID-19.  
41  
42  
43  
44

#### 45 **Acknowledgements:**

46 We would like to thank Mark Duffett and Neill Adhikari for critically reviewing this article  
47  
48  
49  
50  
51  
52  
53  
54  
55  
56  
57  
58  
59  
60

## References

1. Grasselli G, Zangrillo A, Zanella A, et al. Baseline Characteristics and Outcomes of 1591 Patients Infected With SARS-CoV-2 Admitted to ICUs of the Lombardy Region, Italy. *JAMA* 2020.
2. Bhatraju PK, Ghassemieh BJ, Nichols M, et al. Covid-19 in Critically Ill Patients in the Seattle Region - Case Series. *N Engl J Med* 2020; **382**(21): 2012-22.
3. Richardson S, Hirsch JS, Narasimhan M, et al. Presenting Characteristics, Comorbidities, and Outcomes Among 5700 Patients Hospitalized With COVID-19 in the New York City Area. *JAMA* 2020.
4. Armstrong RA, Kane AD, Cook TM. Outcomes from intensive care in patients with COVID-19: a systematic review and meta-analysis of observational studies. *Anaesthesia* 2020.
5. Goyal P, Choi JJ, Pinheiro LC, et al. Clinical Characteristics of Covid-19 in New York City. *N Engl J Med* 2020; **382**(24): 2372-4.
6. Yang X, Yu Y, Xu J, et al. Clinical course and outcomes of critically ill patients with SARS-CoV-2 pneumonia in Wuhan, China: a single-centered, retrospective, observational study. *Lancet Respir Med* 2020; **8**(5): 475-81.
7. Public Health Agency of Canada. <https://www.canada.ca/en/public-health/services/diseases/2019-novel-coronavirus-infection.html> (accessed July 21, 2020).
8. Mitra AR, Fergusson NA, Lloyd-Smith E, et al. Baseline characteristics and outcomes of patients with COVID-19 admitted to intensive care units in Vancouver, Canada: a case series. *CMAJ* 2020; **192**(26): E694-E701.
9. investigators S-S. Using research to prepare for outbreaks of severe acute respiratory infection. *BMJ Glob Health* 2019; **4**(1): e001061.
10. Murthy S, Carson G, Horby P, Merson L, Webb S. Clinical research networks and assessing pandemic severity. *Lancet Glob Health* 2019; **7**(1): e33.
11. Cao B, Wang Y, Wen D, et al. A Trial of Lopinavir-Ritonavir in Adults Hospitalized with Severe Covid-19. *N Engl J Med* 2020.
12. Cummings MJ, Baldwin MR, Abrams D, et al. Epidemiology, clinical course, and outcomes of critically ill adults with COVID-19 in New York City: a prospective cohort study. *Lancet* 2020; **395**(10239): 1763-70.
13. Lescure FX, Bouadma L, Nguyen D, et al. Clinical and virological data of the first cases of COVID-19 in Europe: a case series. *Lancet Infect Dis* 2020; **20**(6): 697-706.
14. R Core Team (2020). R: A language and environment for statistical computing. R Foundation for Statistical Computing, Vienna, Austria. URL <https://www.R-project.org/>.
15. Vandembroucke JP, von Elm E, Altman DG, et al. Strengthening the Reporting of Observational Studies in Epidemiology (STROBE): explanation and elaboration. *PLoS Med* 2007; **4**(10): e297.
16. Gupta S, Hayek SS, Wang W, et al. Factors Associated With Death in Critically Ill Patients With Coronavirus Disease 2019 in the US. *JAMA Intern Med* 2020.
17. Zhou F, Yu T, Du R, et al. Clinical course and risk factors for mortality of adult inpatients with COVID-19 in Wuhan, China: a retrospective cohort study. *Lancet* 2020.
18. The Contribution of the Age Distribution of Cases to COVID-19 Case Fatality Across Countries. *Annals of Internal Medicine*; **0**(0): null.
19. Docherty AB, Harrison EM, Green CA, et al. Features of 20 133 UK patients in hospital with covid-19 using the ISARIC WHO Clinical Characterisation Protocol: prospective observational cohort study. *BMJ* 2020; **369**: m1985.
20. Padwal RS, Bienek A, McAlister FA, Campbell NR, Outcomes Research Task Force of the Canadian Hypertension Education P. Epidemiology of Hypertension in Canada: An Update. *Can J Cardiol* 2016; **32**(5): 687-94.



- 1
- 2
- 3
- 4 21. Hosseini Z, Whiting SJ, Vatanparast H. Type 2 diabetes prevalence among Canadian adults -
- 5 dietary habits and sociodemographic risk factors. *Appl Physiol Nutr Metab* 2019; **44**(10): 1099-104.
- 6 22. Agarwal A, Basmaji J, Muttalib F, et al. High-flow nasal cannula for acute hypoxemic respiratory
- 7 failure in patients with COVID-19: systematic reviews of effectiveness and its risks of aerosolization,
- 8 dispersion, and infection transmission. *Can J Anaesth* 2020.
- 9
- 10
- 11
- 12
- 13
- 14
- 15
- 16
- 17
- 18
- 19
- 20
- 21
- 22
- 23
- 24
- 25
- 26
- 27
- 28
- 29
- 30
- 31
- 32
- 33
- 34
- 35
- 36
- 37
- 38
- 39
- 40
- 41
- 42
- 43
- 44
- 45
- 46
- 47
- 48
- 49
- 50
- 51
- 52
- 53
- 54
- 55
- 56
- 57
- 58
- 59
- 60

Confidential



## Figure Legends

**Figure 1:** Presenting symptoms seen at admission amongst hospitalized patients with COVID-19.

**Figure 2:** Presenting co-morbidities at admission amongst hospitalized patients with COVID-19.

**Figure 3:** Time-to-event analysis for mortality

**Supplemental Figure 1:** Heatmap for correlation between symptoms, with fill colour being the phi correlation coefficient between each pair of symptoms, calculated amongst patients with recorded presence or absence or both.

**Supplemental Figure 2:** Length of hospital stay by (A) sex and (B) location

**Supplemental Figure 3:** Length of hospital stay by age

**Supplemental Figure 4:** Distribution of combinations of four most common co-morbidities; filled and empty circles below the x-axis indicate the presence or absence of each comorbidity, with other

**Supplemental Figure 5:** Distribution of time from admission to outcome – either death or recovery. The blue curve is the gamma distribution fit to the data, and the black dashed line indicates the position of the expected mean. The expected mean differs from the observed mean in that it accounts for unobserved outcomes.

**Table 1: Demographics of All Hospitalized or Critically Ill Patients with COVID-19**

|                                                          | <b>All Hospitalized Patients</b><br>N=811 | <b>ICU Patients</b><br>N=328 |
|----------------------------------------------------------|-------------------------------------------|------------------------------|
| Age, years, median, (IQR)                                | 64 (53, 75)                               | 65 (54, 72)                  |
| <19, n (%)                                               | 21 (2)                                    | 5 (1)                        |
| >70, n (%)                                               | 40 (8)                                    | 23 (7)                       |
| Female (n, %)                                            | 315 (39)                                  | 105 (32)                     |
| Co-morbidities (n, %)                                    |                                           |                              |
| Diabetes                                                 | 203 (25)                                  | 90 (27)                      |
| Cardiac disease                                          | 171 (21)                                  | 67 (20)                      |
| Chronic kidney disease                                   | 102 (13)                                  | 67 (20)                      |
| Liver disease                                            | 30 (4)                                    | 14 (4)                       |
| Asthma                                                   | 90 (11)                                   | 38 (12)                      |
| Smoking                                                  | 37 (5)                                    | 16 (5)                       |
| Obesity                                                  | 23 (3)                                    | 15(5)                        |
| AIDS/HIV                                                 | 8 (1)                                     | 3 (1)                        |
| Malignant neoplasm                                       | 28 (3)                                    | 13 (4)                       |
| Pregnancy                                                | 12 (1)                                    | 0                            |
| Time from symptom onset to hospital admission (mean, sd) | 12.5 (8.8)                                | 15 (9.3)                     |
| Overall mortality (n, %)                                 | 166 (20)                                  | 86 (26)                      |

**Table 2: Interventions received among All Hospitalized or Critically Ill Patients with COVID-19**

| Treatments, n (%)         | All hospitalized Patients<br>N=811 | ICU Patients<br>N=328 |
|---------------------------|------------------------------------|-----------------------|
| Antibiotics               | 640 (79)                           | 283 (86)              |
| Antiviral agent           | 172 (22)                           | 76 (23)               |
| Systemic corticosteroids  | 185 (23)                           | 95 (29)               |
| Oxygen                    | 602 (74)                           | 328 (100)             |
| High-flow nasal oxygen    | 105(13)                            | 40 (12)               |
| Non-invasive ventilation  | 54 (7)                             | 35 (11)               |
| Invasive ventilation      | -                                  | 291 (88)              |
| Prone ventilation         | -                                  | 55 (17)               |
| Inotropes/vasopressors    | -                                  | 274 (83)              |
| Renal replacement therapy | -                                  | 49 (15)               |
| ECMO                      | -                                  | 13 (4)                |
| Tracheostomy              | -                                  | 10 (3)                |

Confidential

**Table 3. Characteristics of Patients with COVID-19 who Died or Survived.**

|                                                                | <b>Patients who Survived<br/>N=625</b> | <b>Patients who Died<br/>N=166</b> | <b>P Value</b> |
|----------------------------------------------------------------|----------------------------------------|------------------------------------|----------------|
| Age, Mean (SD)                                                 | 50.4 (25.6)                            | 71.7 (11.9)                        | <0.001         |
| <18 years (N, %)                                               | 26 (100)                               | 0                                  |                |
| 19-39 years (N, %)                                             | 75 (96)                                | 3 (4)                              |                |
| 40-59 years (N, %)                                             | 180 (88)                               | 24 (12)                            |                |
| 60-79 years (N, %)                                             | 316 (82.5)                             | 67 (17.5)                          |                |
| ≥ 80 years (N, %)                                              | 48 (40)                                | 72 (60)                            |                |
| Female (%)                                                     | 37.5                                   | 43.9                               | 0.171          |
| Male (%)                                                       | 62.5                                   | 56.1                               |                |
| <b>Co-morbidities (%)</b>                                      |                                        |                                    |                |
| Hypertension                                                   | 46                                     | 68                                 | <0.001         |
| Diabetes                                                       | 24                                     | 42                                 | <0.001         |
| Chronic kidney disease                                         | 11                                     | 22                                 | 0.001          |
| Asthma                                                         | 11                                     | 16                                 | 0.155          |
| Smoking                                                        | 3                                      | 9                                  | 0.012          |
| Pregnancy                                                      | 100                                    | 0                                  |                |
| Time from symptom onset to hospital admission, days (Mean, SD) | 6.9 (12.4)                             | 3.9 (16.3)                         | 0.035          |
| Length of Stay in Hospital, days (Mean, SD)                    | 15.9 (20.1)                            | 16.4 (22.2)                        | 0.77           |

1  
2  
3  
4  
5  
6  
7  
8  
9  
10  
11  
12  
13  
14  
15  
16  
17  
18  
19  
20  
21  
22  
23  
24  
25  
26  
27  
28  
29  
30  
31  
32  
33  
34  
35  
36  
37  
38  
39  
40  
41

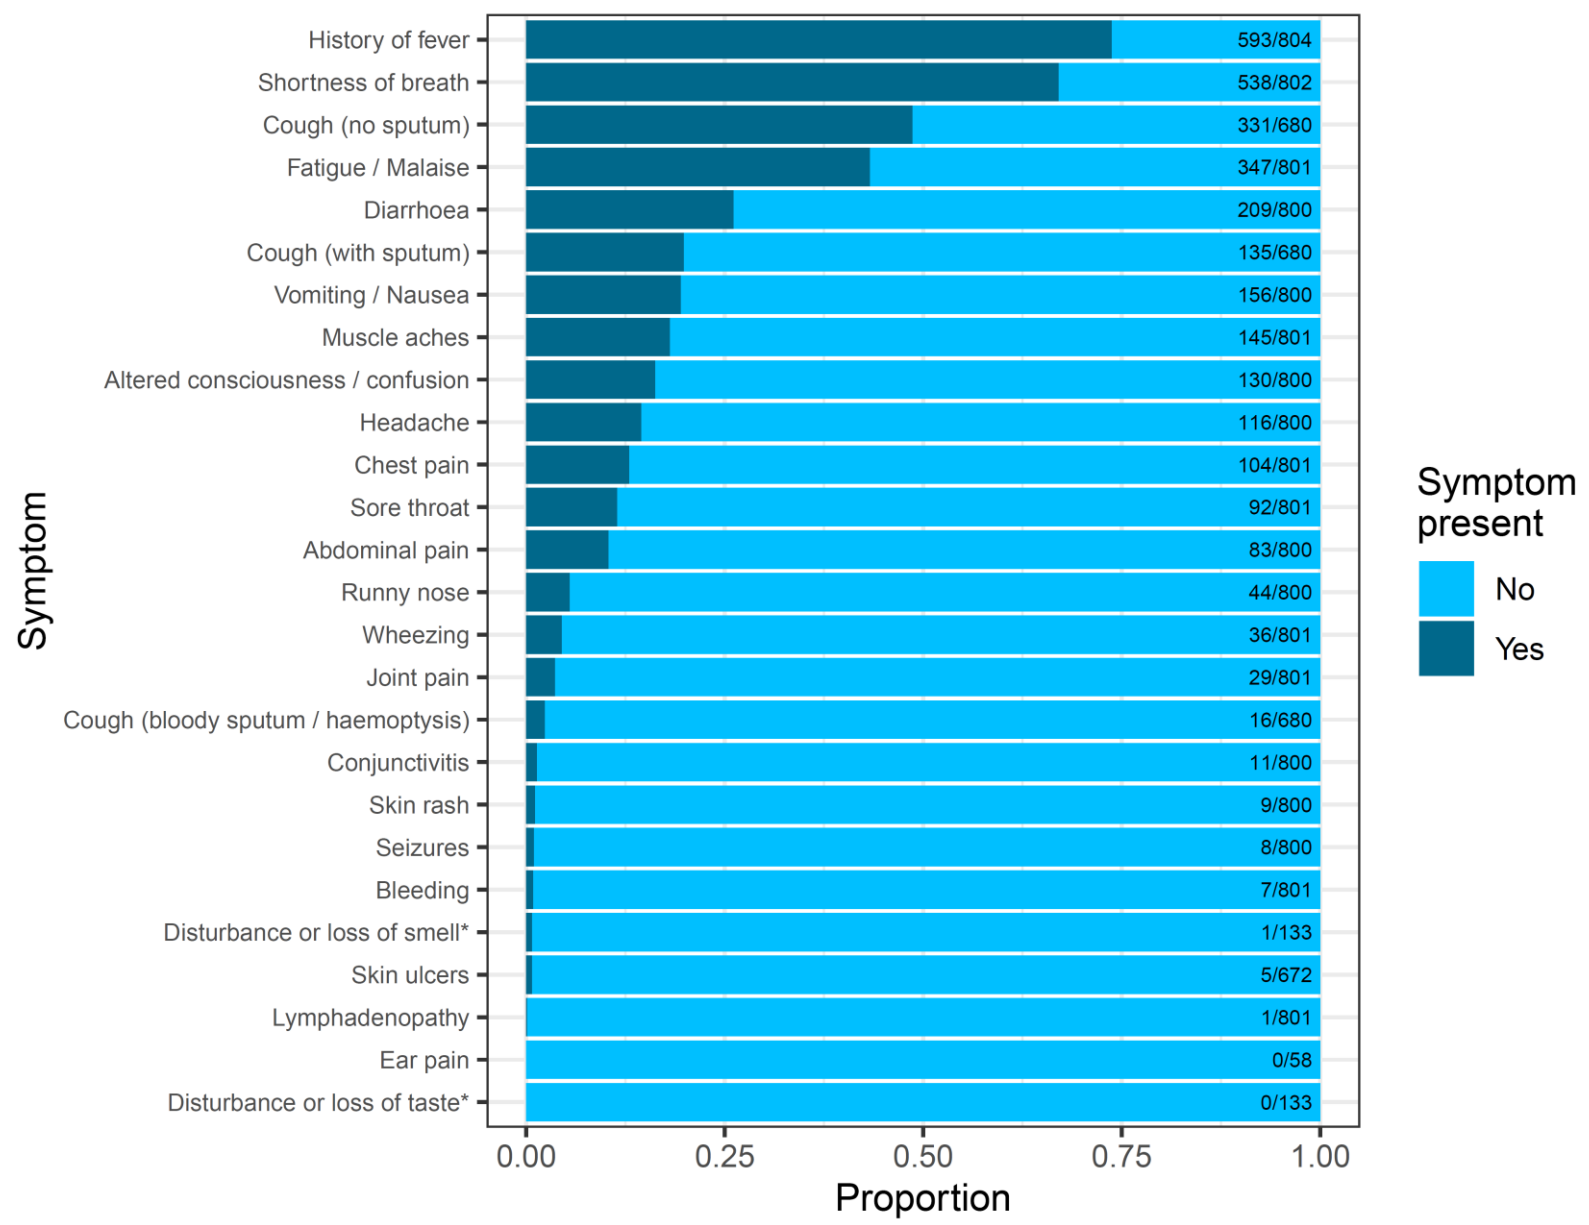

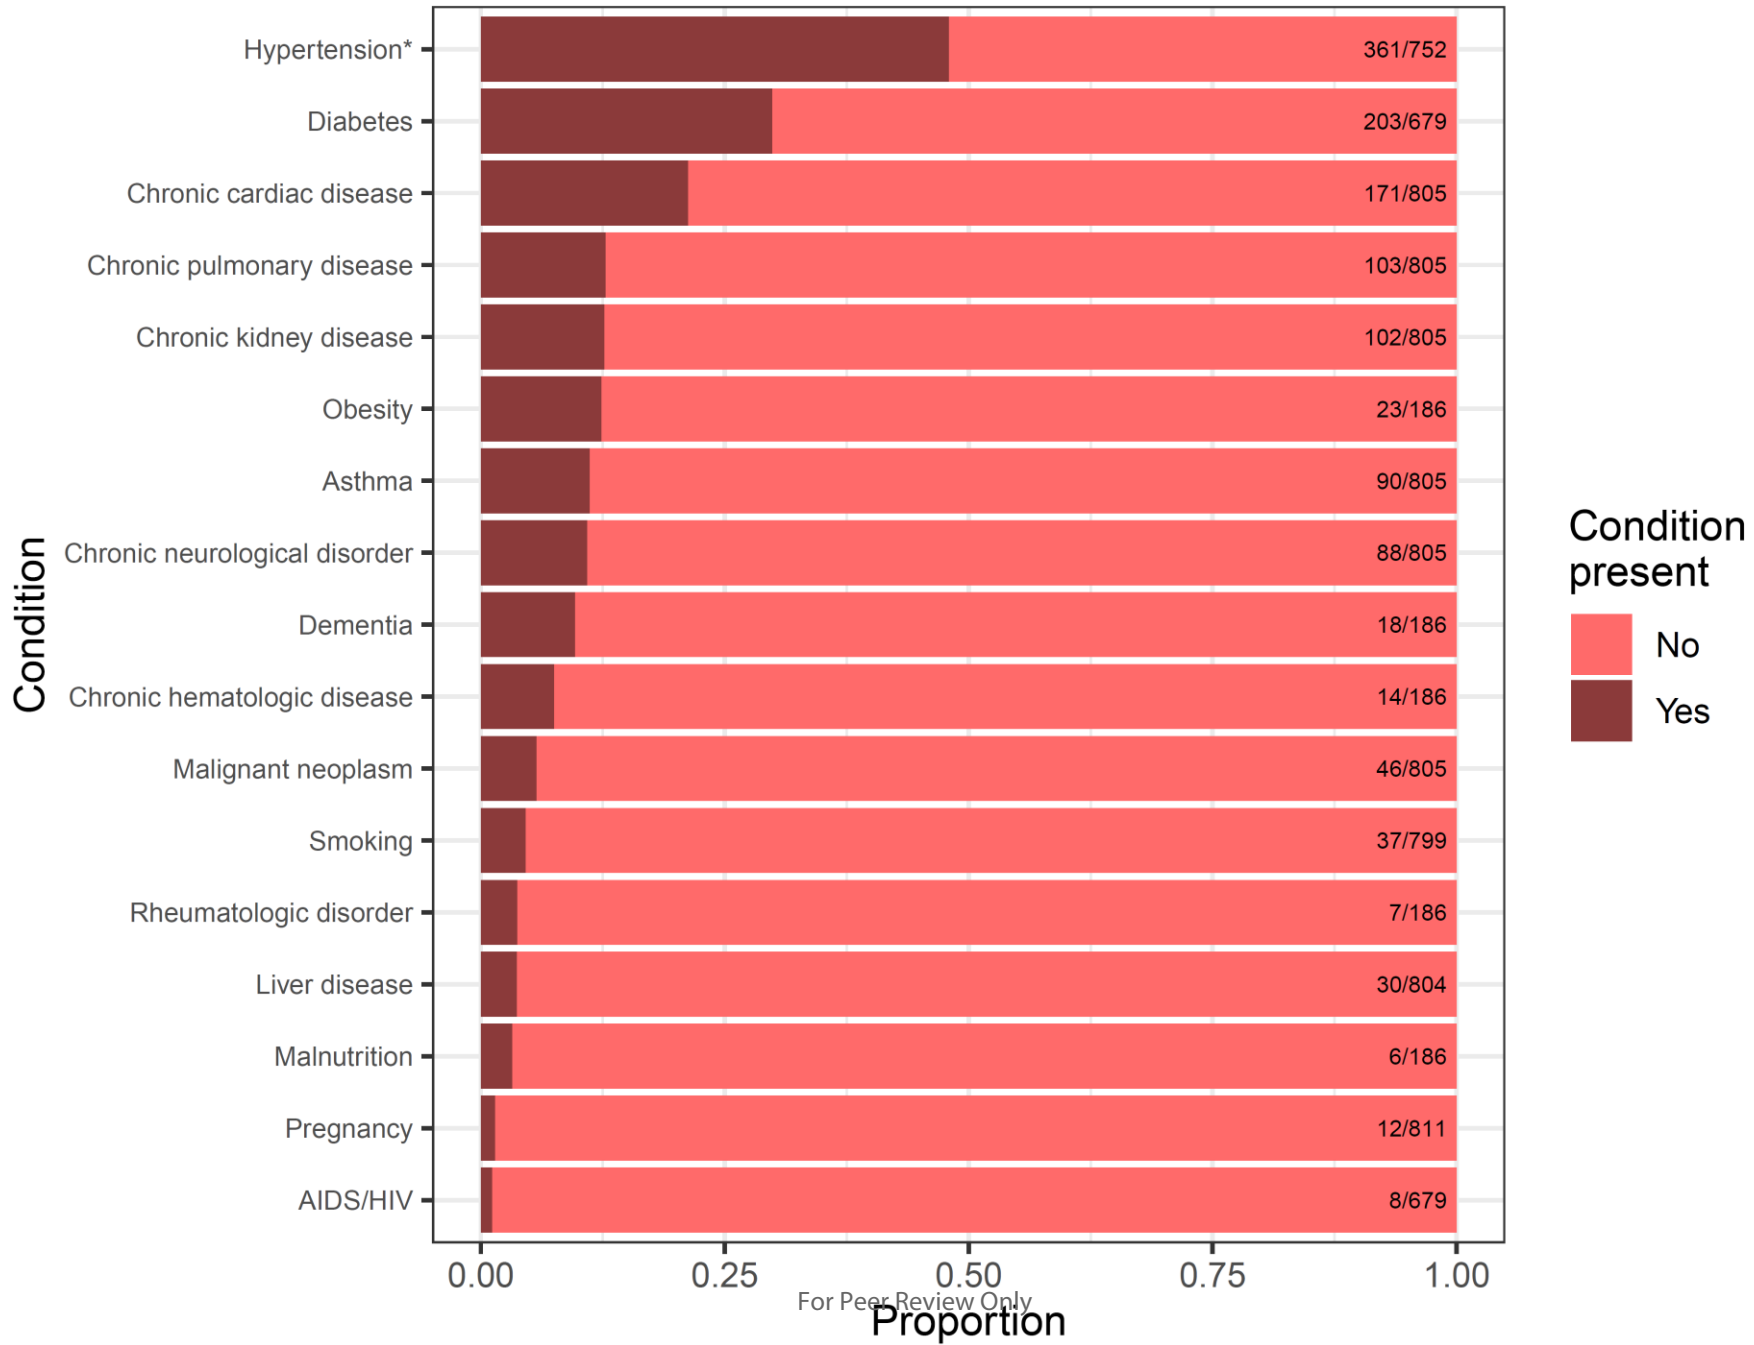

For Peer Review Only

Proportion

1  
2  
3  
4  
5  
6  
7  
8  
9  
10  
11  
12  
13  
14  
15  
16  
17  
18  
19  
20  
21  
22  
23  
24  
25  
26  
27  
28  
29  
30  
31  
32  
33  
34  
35  
36  
37  
38  
39  
40  
41

1  
2  
3  
4  
5  
6  
7  
8  
9  
10  
11  
12  
13  
14  
15  
16  
17  
18  
19  
20  
21  
22  
23  
24  
25  
26  
27  
28  
29  
30  
31  
32  
33  
34  
35  
36  
37  
38  
39  
40  
41

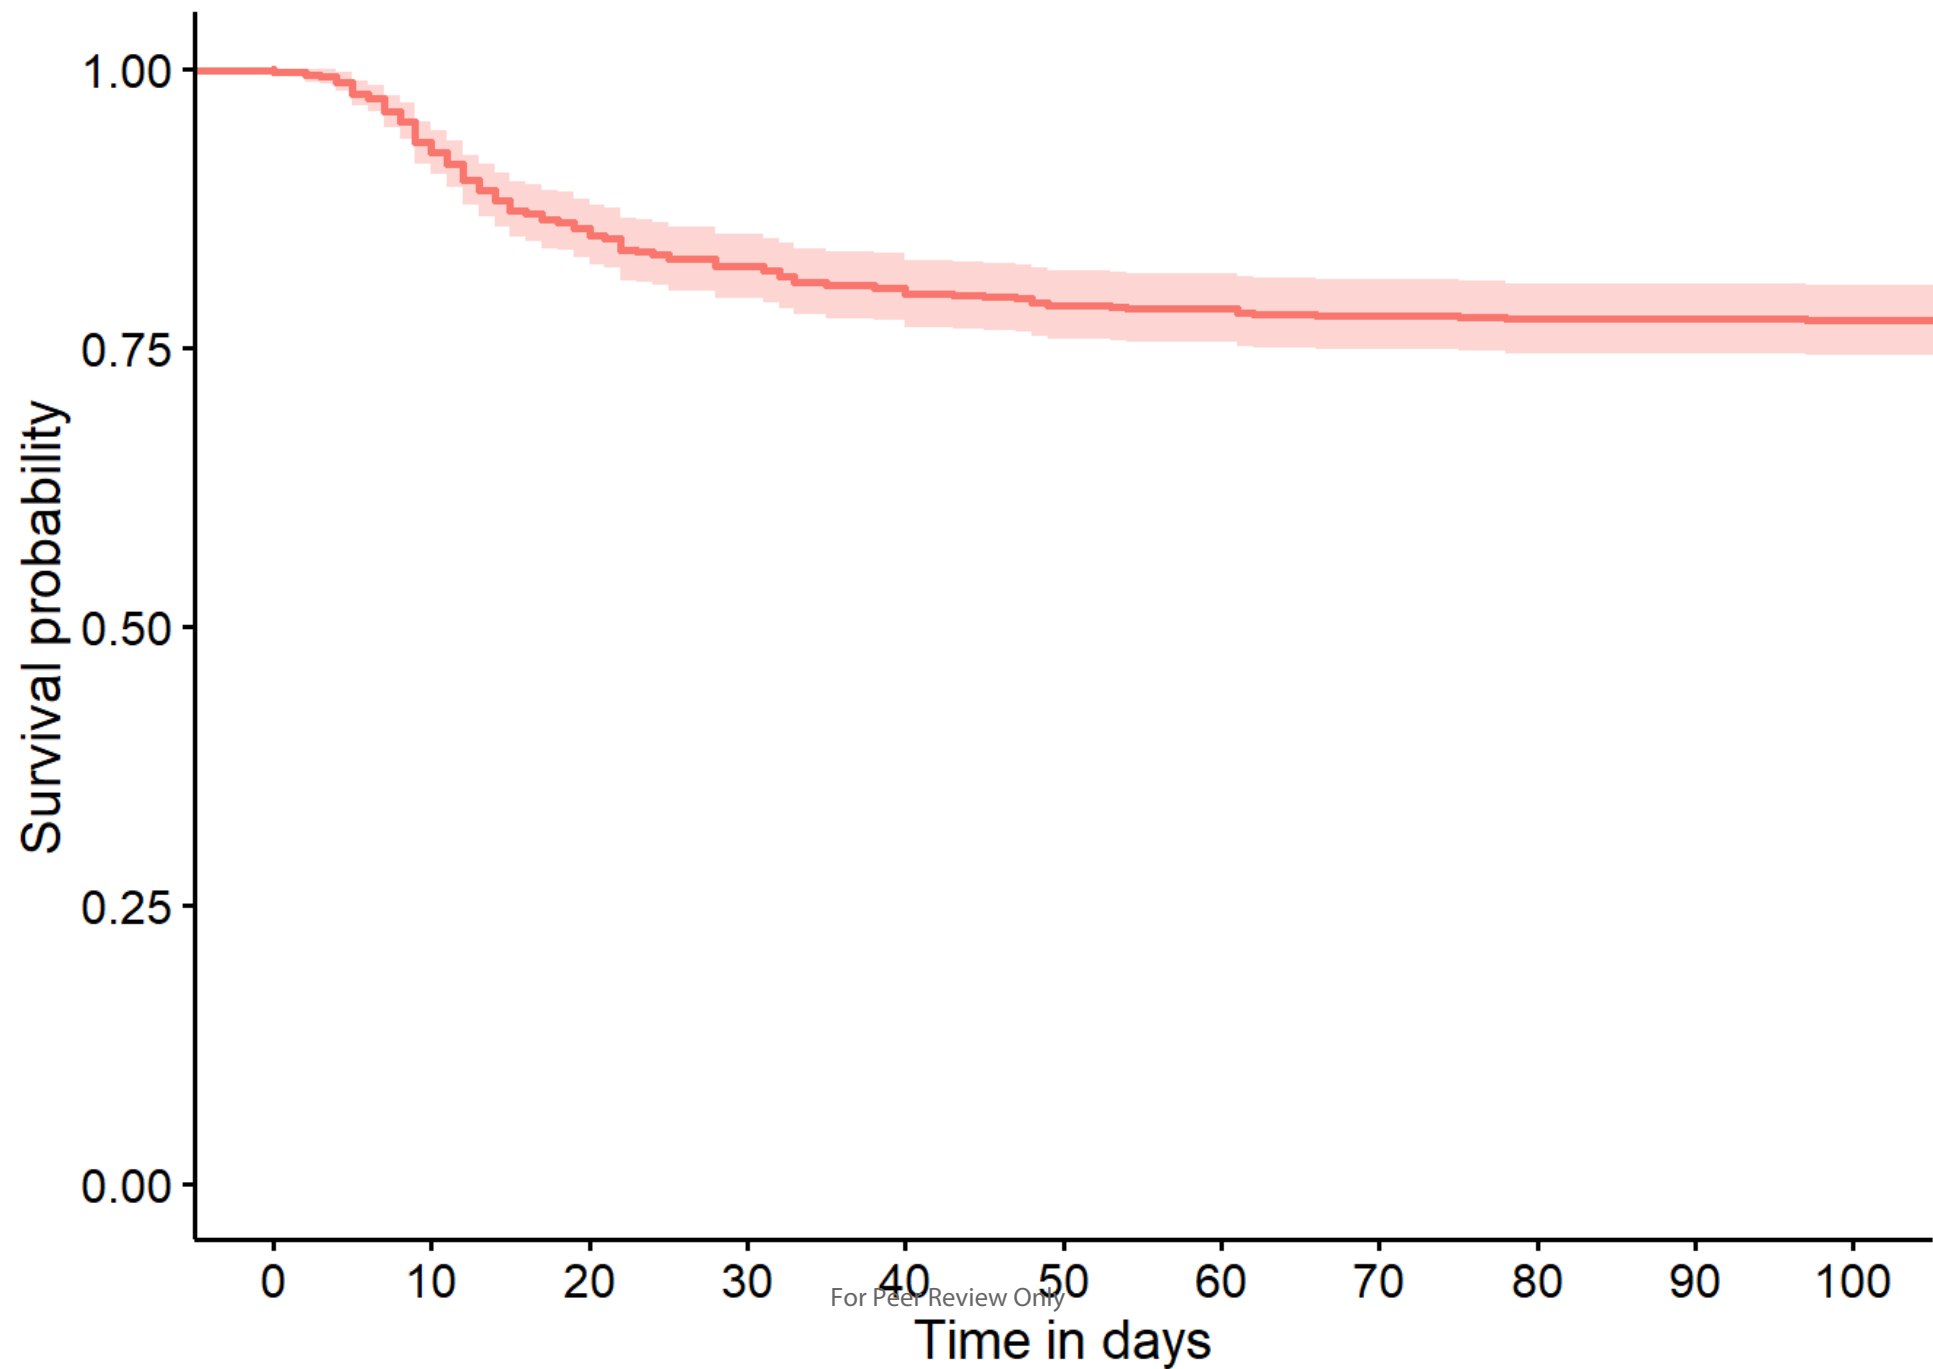

For Peer Review Only



### Symptoms present at admission

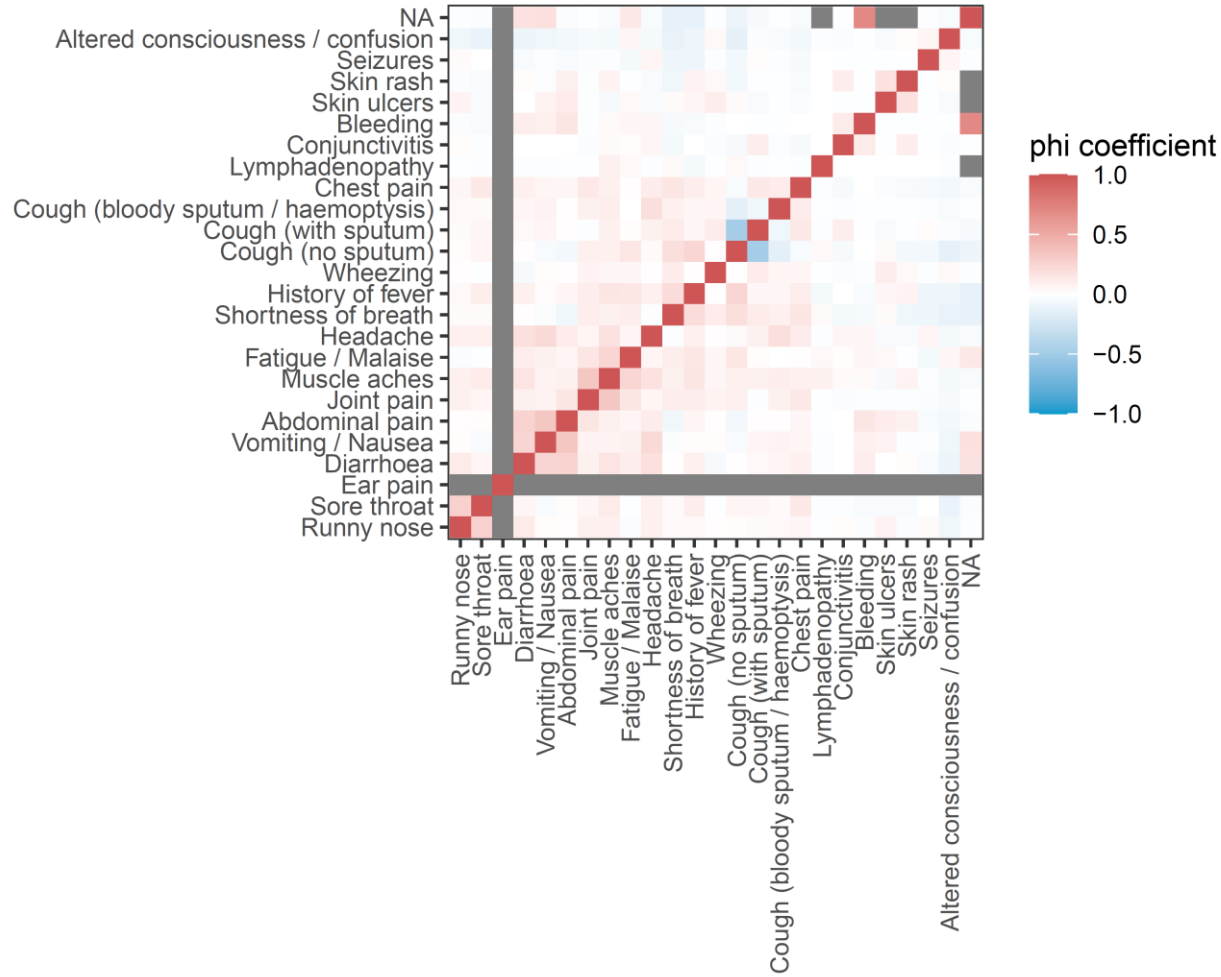

1  
2  
3  
4  
5  
6  
7  
8  
9  
10  
11  
12  
13  
14  
15  
16  
17  
18  
19  
20  
21  
22  
23  
24  
25  
26  
27  
28  
29  
30  
31  
32  
33  
34  
35  
36  
37  
38  
39  
40  
41

1  
2  
3  
4  
5  
6  
7  
8  
9  
10  
11  
12  
13  
14  
15  
16  
17  
18  
19  
20  
21  
22  
23  
24  
25  
26  
27  
28  
29  
30  
31  
32  
33  
34  
35  
36  
37  
38  
39  
40  
41

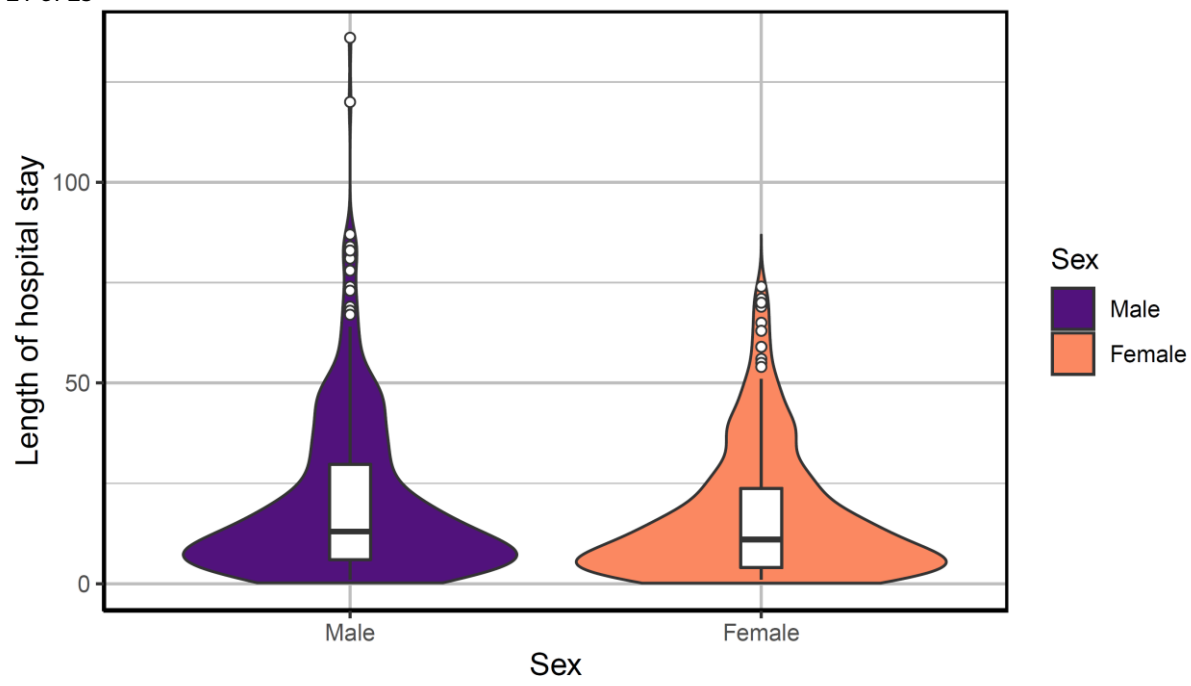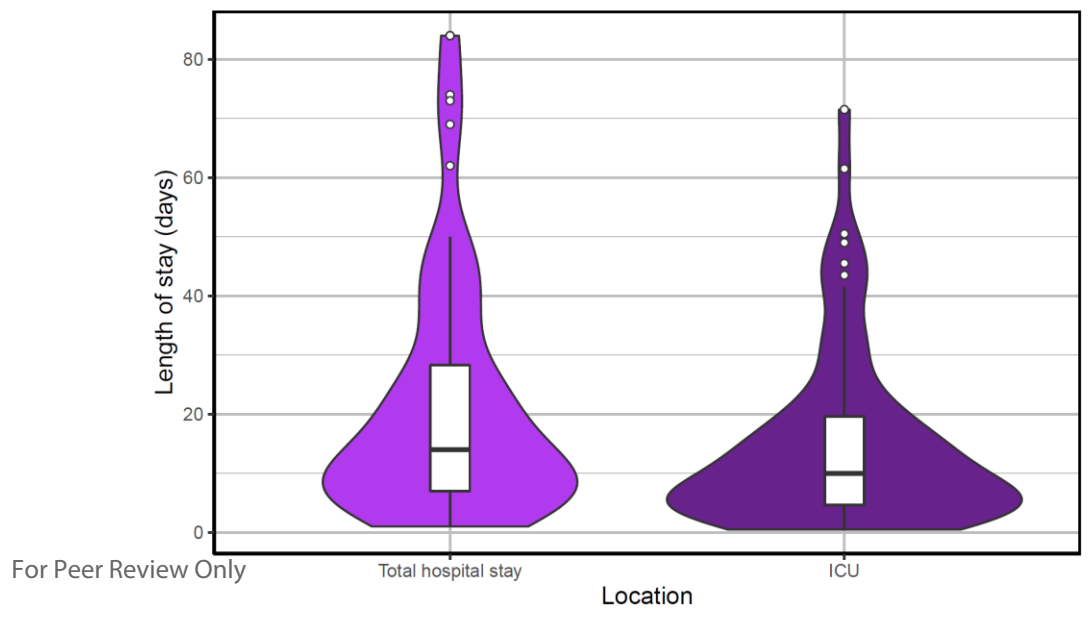

For Peer Review Only

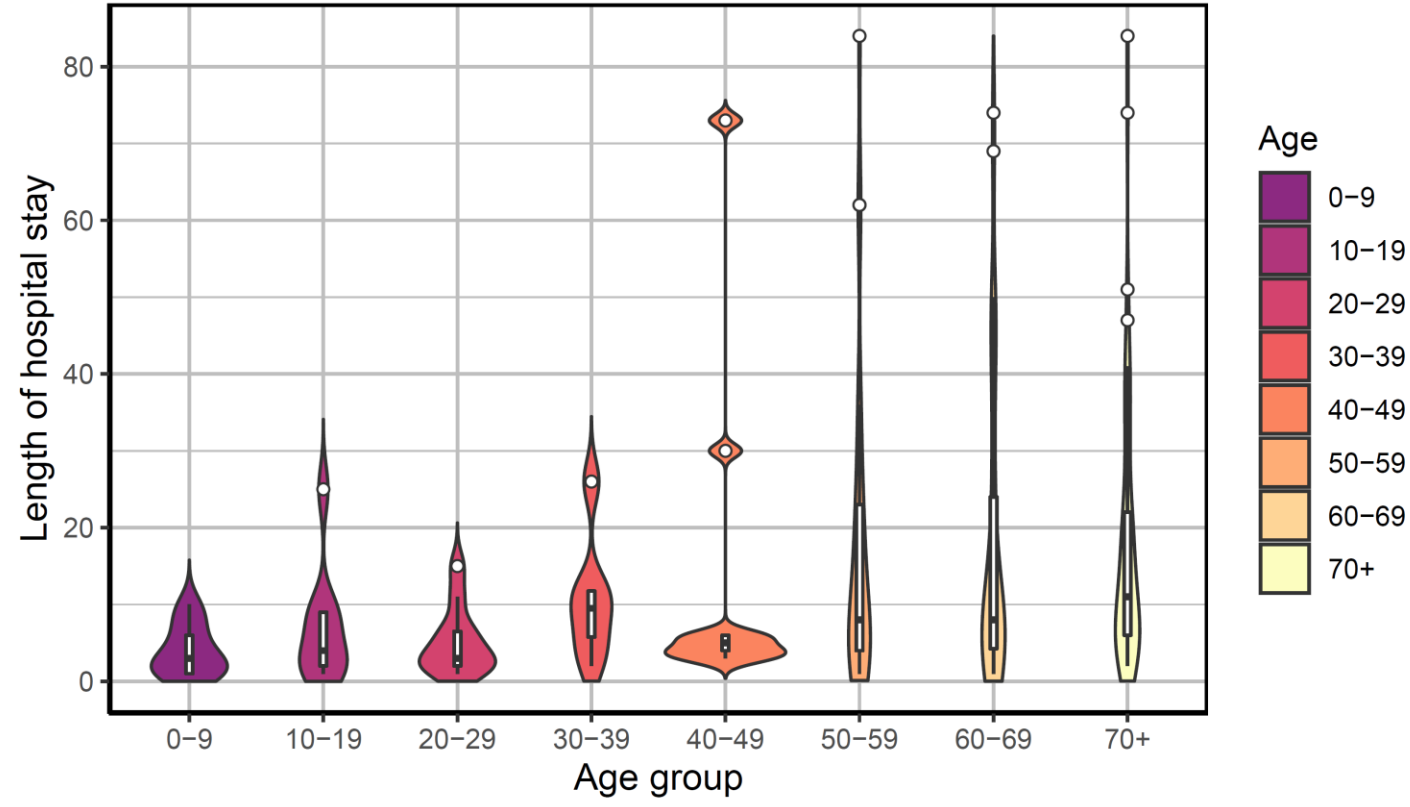

1  
2  
3  
4  
5  
6  
7  
8  
9  
10  
11  
12  
13  
14  
15  
16  
17  
18  
19  
20  
21  
22  
23  
24  
25  
26  
27  
28  
29  
30  
31  
32  
33  
34  
35  
36  
37  
38  
39  
40  
41

1  
2  
3  
4  
5  
6  
7  
8  
9  
10  
11  
12  
13  
14  
15  
16  
17  
18  
19  
20  
21  
22  
23  
24  
25  
26  
27  
28  
29  
30  
31  
32  
33  
34  
35  
36  
37  
38  
39  
40  
41

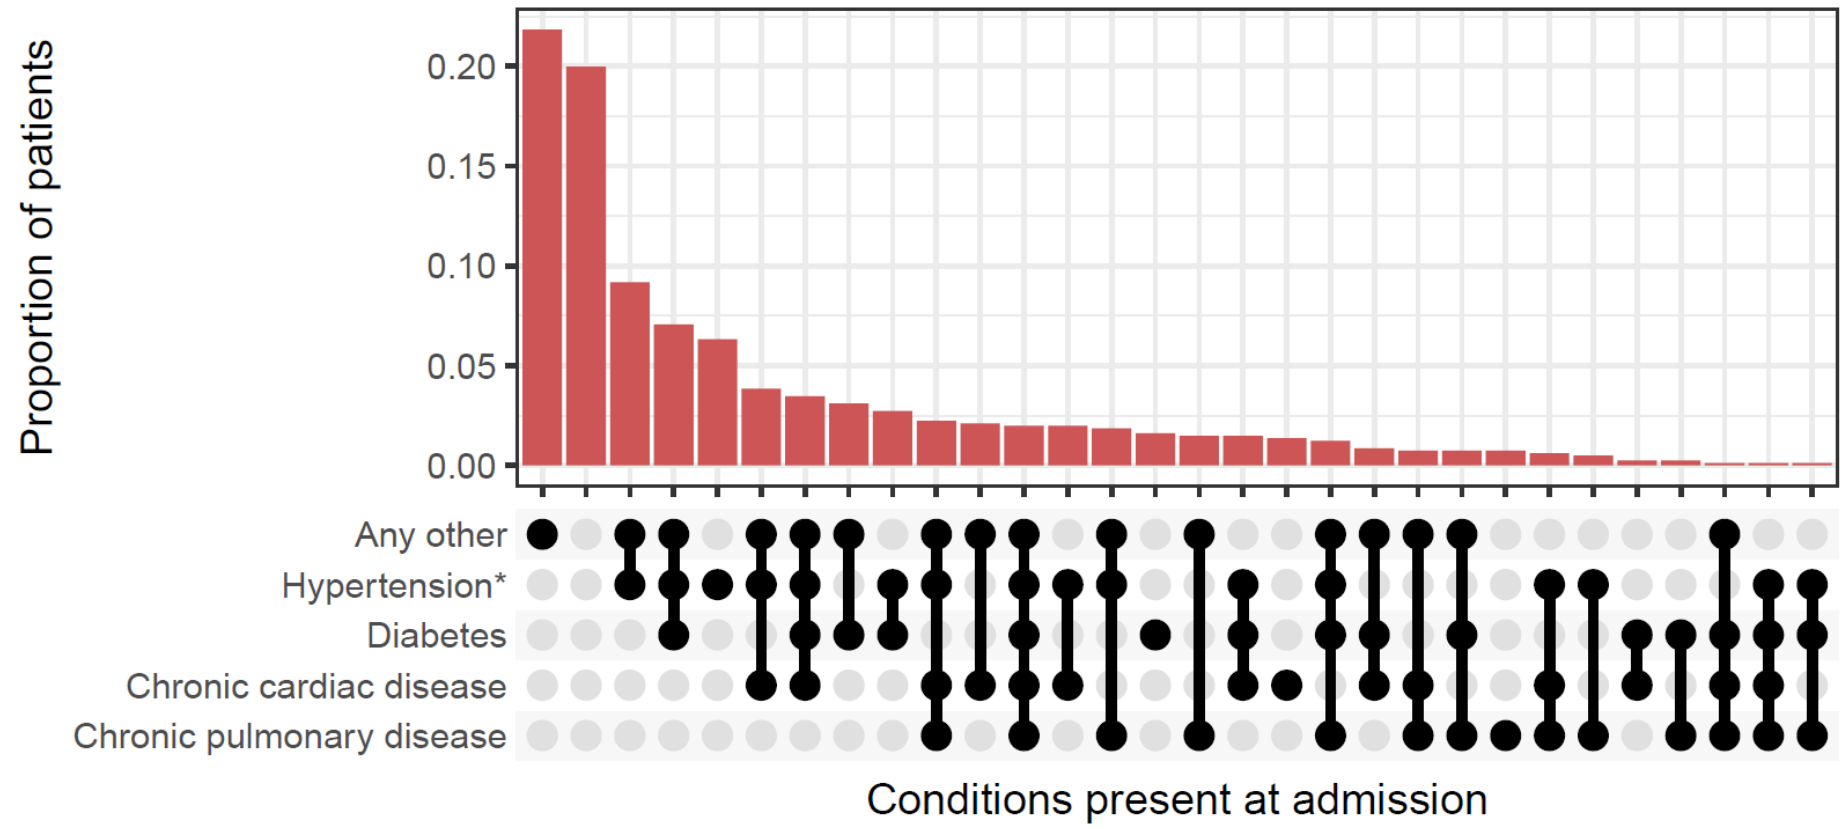

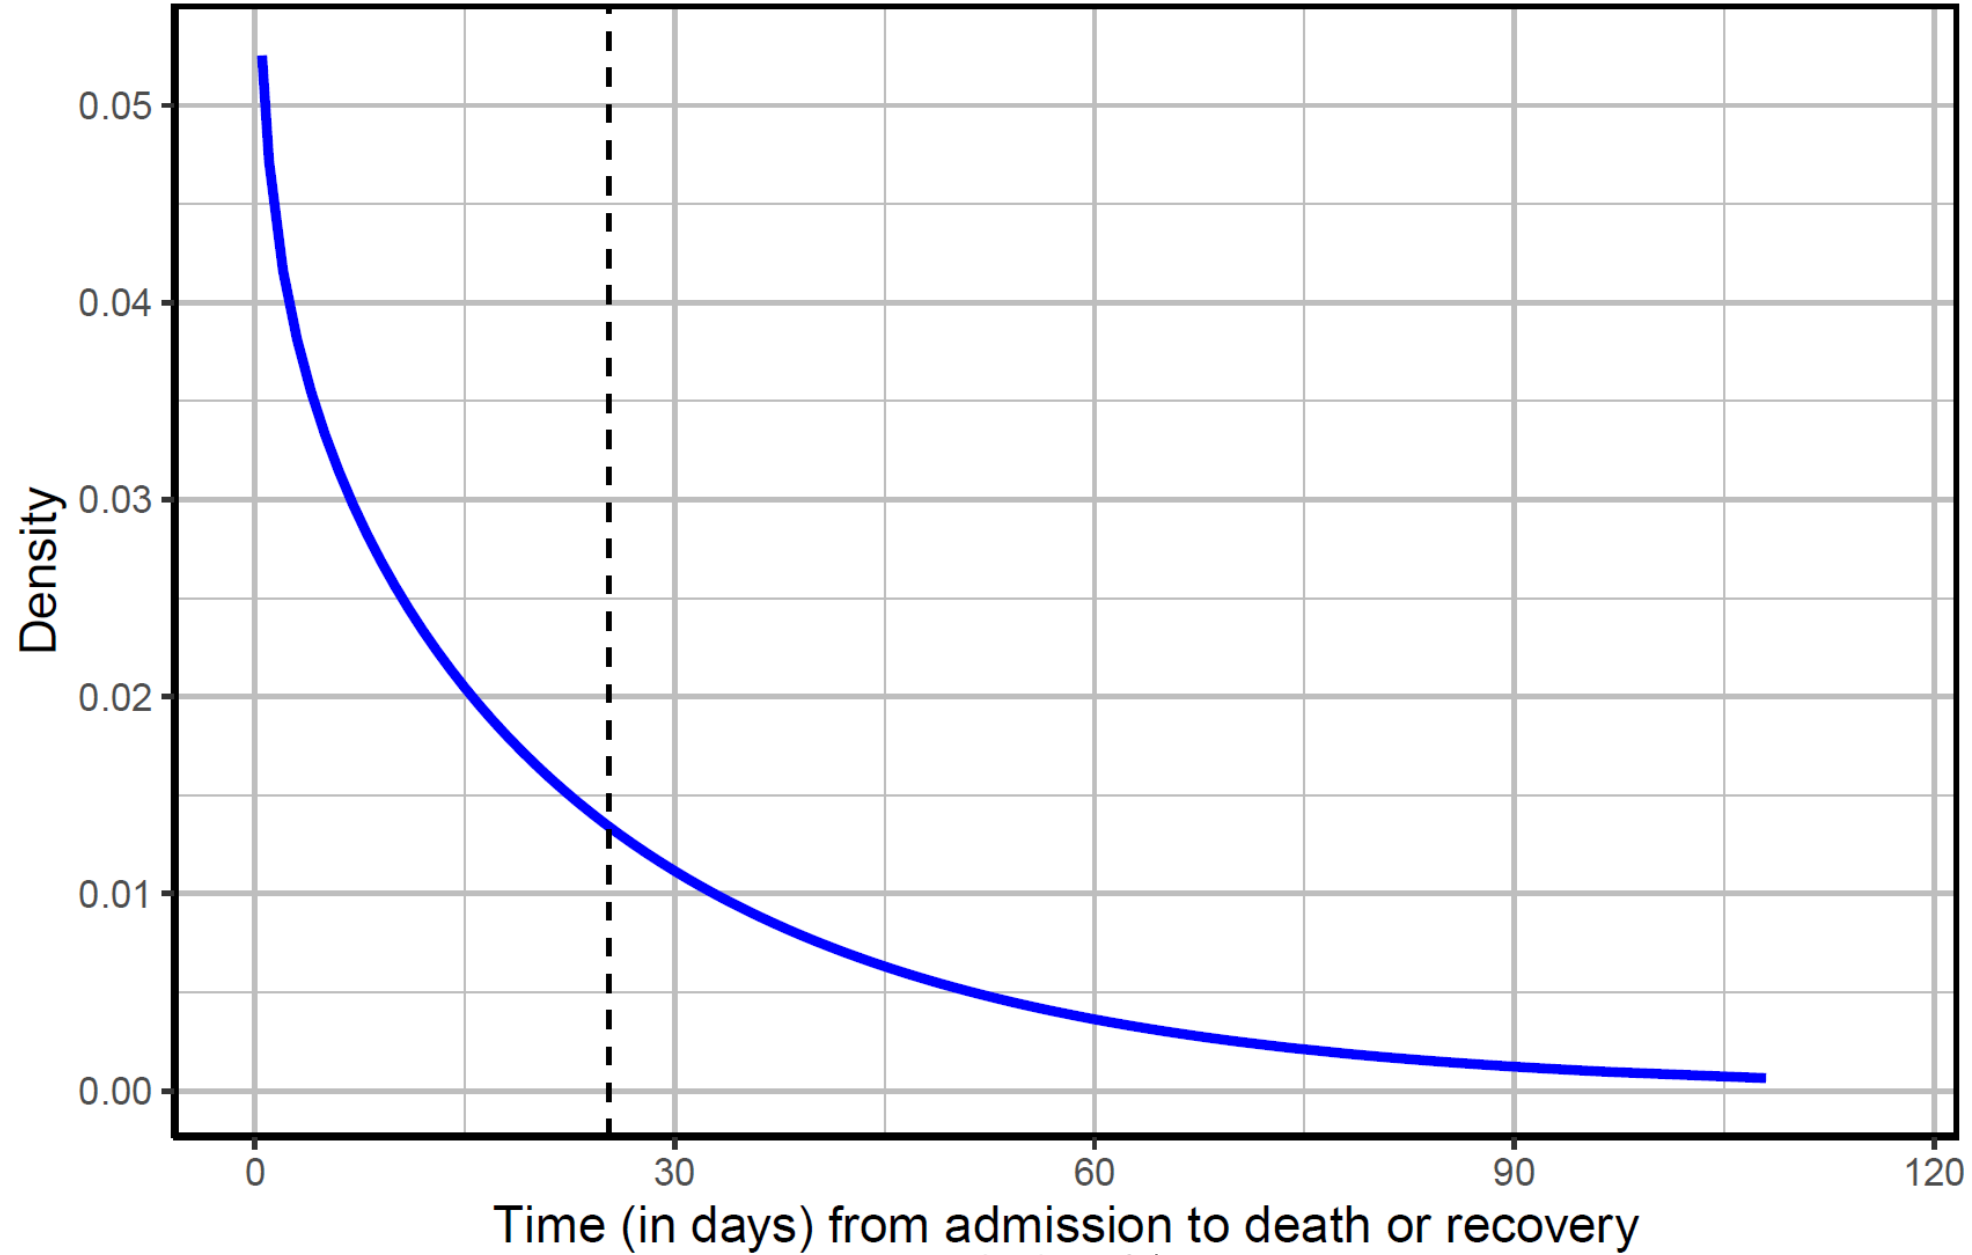

Time (in days) from admission to death or recovery

For Peer Review Only

1  
2  
3  
4  
5  
6  
7  
8  
9  
10  
11  
12  
13  
14  
15  
16  
17  
18  
19  
20  
21  
22  
23  
24  
25  
26  
27  
28  
29  
30  
31  
32  
33  
34  
35  
36  
37  
38  
39  
40  
41

1 STROBE Statement—Checklist of items that should be included in reports of *cohort studies*

|                           | Item No | Recommendation                                                                                                                                                                                    | Page                                 |
|---------------------------|---------|---------------------------------------------------------------------------------------------------------------------------------------------------------------------------------------------------|--------------------------------------|
| <b>Title and abstract</b> | 1       | (a) Indicate the study's design with a commonly used term in the title or the abstract                                                                                                            | 1                                    |
|                           |         | (b) Provide in the abstract an informative and balanced summary of what was done and what was found                                                                                               | 3                                    |
| <b>Introduction</b>       |         |                                                                                                                                                                                                   |                                      |
| Background/rationale      | 2       | Explain the scientific background and rationale for the investigation being reported                                                                                                              | 1                                    |
| Objectives                | 3       | State specific objectives, including any prespecified hypotheses                                                                                                                                  | 1                                    |
| <b>Methods</b>            |         |                                                                                                                                                                                                   |                                      |
| Study design              | 4       | Present key elements of study design early in the paper                                                                                                                                           | 1                                    |
| Setting                   | 5       | Describe the setting, locations, and relevant dates, including periods of recruitment, exposure, follow-up, and data collection                                                                   | 1                                    |
| Participants              | 6       | (a) Give the eligibility criteria, and the sources and methods of selection of participants. Describe methods of follow-up                                                                        | 1                                    |
|                           |         | (b) For matched studies, give matching criteria and number of exposed and unexposed                                                                                                               | N/A                                  |
| Variables                 | 7       | Clearly define all outcomes, exposures, predictors, potential confounders, and effect modifiers. Give diagnostic criteria, if applicable                                                          | Reported in results – add to methods |
| Data sources/measurement  | 8*      | For each variable of interest, give sources of data and details of methods of assessment (measurement). Describe comparability of assessment methods if there is more than one group              | 1                                    |
| Bias                      | 9       | Describe any efforts to address potential sources of bias                                                                                                                                         | 2                                    |
| Study size                | 10      | Explain how the study size was arrived at                                                                                                                                                         | 1                                    |
| Quantitative variables    | 11      | Explain how quantitative variables were handled in the analyses. If applicable, describe which groupings were chosen and why                                                                      | 1-2                                  |
| Statistical methods       | 12      | (a) Describe all statistical methods, including those used to control for confounding                                                                                                             | 2                                    |
|                           |         | (b) Describe any methods used to examine subgroups and interactions                                                                                                                               | N/A                                  |
|                           |         | (c) Explain how missing data were addressed                                                                                                                                                       | 2                                    |
|                           |         | (d) If applicable, explain how loss to follow-up was addressed                                                                                                                                    | 2                                    |
|                           |         | (e) Describe any sensitivity analyses                                                                                                                                                             | n/a                                  |
| <b>Results</b>            |         |                                                                                                                                                                                                   |                                      |
| Participants              | 13*     | (a) Report numbers of individuals at each stage of study—eg numbers potentially eligible, examined for eligibility, confirmed eligible, included in the study, completing follow-up, and analysed | N/A                                  |
|                           |         | (b) Give reasons for non-participation at each stage                                                                                                                                              | n/a                                  |
|                           |         | (c) Consider use of a flow diagram                                                                                                                                                                | n/a                                  |
| Descriptive data          | 14*     | (a) Give characteristics of study participants (eg demographic, clinical, social) and information on exposures and potential confounders                                                          | Table 1                              |
|                           |         | (b) Indicate number of participants with missing data for each variable of interest                                                                                                               | 2                                    |
|                           |         | (c) Summarise follow-up time (eg, average and total amount)                                                                                                                                       | 2                                    |
| Outcome data              | 15*     | Report numbers of outcome events or summary measures over time                                                                                                                                    | 2                                    |

|    |                          |    |                                                                           |     |
|----|--------------------------|----|---------------------------------------------------------------------------|-----|
| 1  | Main results             | 16 | (a) Give unadjusted estimates and, if applicable, confounder-adjusted     | 2   |
| 2  |                          |    | estimates and their precision (eg, 95% confidence interval). Make clear   |     |
| 3  |                          |    | which confounders were adjusted for and why they were included            |     |
| 4  |                          |    | (b) Report category boundaries when continuous variables were             | 2   |
| 5  |                          |    | categorized                                                               |     |
| 6  |                          |    | (c) If relevant, consider translating estimates of relative risk into     | 3   |
| 7  |                          |    | absolute risk for a meaningful time period                                |     |
| 8  | Other analyses           | 17 | Report other analyses done—eg analyses of subgroups and                   | 3   |
| 9  |                          |    | interactions, and sensitivity analyses                                    |     |
| 10 | <b>Discussion</b>        |    |                                                                           |     |
| 11 | Key results              | 18 | Summarise key results with reference to study objectives                  | 3   |
| 12 | Limitations              | 19 | Discuss limitations of the study, taking into account sources of          | 3-4 |
| 13 |                          |    | potential bias or imprecision. Discuss both direction and magnitude of    |     |
| 14 |                          |    | any potential bias                                                        |     |
| 15 | Interpretation           | 20 | Give a cautious overall interpretation of results considering objectives, | 4   |
| 16 |                          |    | limitations, multiplicity of analyses, results from similar studies, and  |     |
| 17 |                          |    | other relevant evidence                                                   |     |
| 18 | Generalisability         | 21 | Discuss the generalisability (external validity) of the study results     | 4   |
| 19 | <b>Other information</b> |    |                                                                           |     |
| 20 | Funding                  | 22 | Give the source of funding and the role of the funders for the present    | 1   |
| 21 |                          |    | study and, if applicable, for the original study on which the present     |     |
| 22 |                          |    | article is based                                                          |     |

\*Give information separately for exposed and unexposed groups.

**Note:** An Explanation and Elaboration article discusses each checklist item and gives methodological background and published examples of transparent reporting. The STROBE checklist is best used in conjunction with this article (freely available on the Web sites of PLoS Medicine at <http://www.plosmedicine.org/>, Annals of Internal Medicine at <http://www.annals.org/>, and Epidemiology at <http://www.epidem.com/>). Information on the STROBE Initiative is available at <http://www.strobe-statement.org>.



1  
2  
3  
4  
5  
6  
7  
8  
9  
10  
11  
12  
13  
14  
15  
16  
17  
18  
19  
20  
21  
22  
23  
24  
25  
26  
27  
28  
29  
30  
31  
32  
33  
34  
35  
36  
37  
38  
39  
40  
41  
42  
43  
44  
45  
46  
47  
48  
49  
50  
51  
52  
53  
54  
55  
56  
57  
58  
59  
60

**Academic Adult Hospitals**

- Centre Hospital Universite de Montreal
- Centre Hospital Universite de Sherbrooke
- Hopital L'Enfant Jesus
- Institut Universitaire de Cardiologie et de Pneumologie de Quebec
- Kingston General Hospital
- University of Manitoba
- McGill University Health Centre
- Mount Sinai Hospital
- The Ottawa Hospital
- Royal Alexandra Hospital
- St. Michael's Hospital
- Sunnybrook Hospital
- St. Joseph's Hospital, Hamilton
- University of Alberta Hospital
- Vancouver General Hospital

**Academic Pediatric Hospitals**

- The Hospital for Sick Children
- Alberta Children's Hospital
- St. Justine Hospital
- Montreal Children's Hospital

**Community Hospitals**

- William Osler Hospital
- North York General Hospital
- Toronto East General Hospital
- Joseph Brant Hospital
- Humber River Hospital
- Victoria General Hospital
- Lions Gate Hospital
- Grand River Hospital
- Grande Prairie Hospital
- Red Deer Regional Hospital
- Sturgeon Community Hospital
- Grey Nuns Community Hospital
- Brantford General Hospital

Confidential
